# Supplementary material for: International Survey of Specialist Fetal Alcohol Spectrum Disorder Diagnostic Clinics: Comparison of Diagnostic Approach and Considerations Regarding the Potential for Unification
Source: MDPI journal article supplement (doi:10.3390/ijerph192315663), 2022-11-25
Supplement: s1 [file s1]

## Diagnostic Clinic Survey

Codebook ▾

## Data Dictionary Codebook

08-08-2019 10:23am

| #                                                                      | Variable / Field Name                                                                | Field Label<br><i>Field Note</i>                                                                                                                                       | Field Attributes (Field Type, Validation, Choices, Calculations, etc.)                                                                                                                                                                                                                                                                                                                                                                                                                                                                                         |   |                            |                |                                      |                     |                              |   |                     |               |   |                     |                    |   |                     |                         |   |                     |                |   |                     |       |
|------------------------------------------------------------------------|--------------------------------------------------------------------------------------|------------------------------------------------------------------------------------------------------------------------------------------------------------------------|----------------------------------------------------------------------------------------------------------------------------------------------------------------------------------------------------------------------------------------------------------------------------------------------------------------------------------------------------------------------------------------------------------------------------------------------------------------------------------------------------------------------------------------------------------------|---|----------------------------|----------------|--------------------------------------|---------------------|------------------------------|---|---------------------|---------------|---|---------------------|--------------------|---|---------------------|-------------------------|---|---------------------|----------------|---|---------------------|-------|
| Instrument: <b>Diagnostic Clinic Survey</b> (diagnostic_clinic_survey) |                                                                                      |                                                                                                                                                                        |                                                                                                                                                                                                                                                                                                                                                                                                                                                                                                                                                                |   |                            |                |                                      |                     |                              |   |                     |               |   |                     |                    |   |                     |                         |   |                     |                |   |                     |       |
| 1                                                                      | record_id                                                                            | Record ID                                                                                                                                                              | text                                                                                                                                                                                                                                                                                                                                                                                                                                                                                                                                                           |   |                            |                |                                      |                     |                              |   |                     |               |   |                     |                    |   |                     |                         |   |                     |                |   |                     |       |
| 2                                                                      | consent                                                                              | By selecting the AGREE button below, I confirm that I have read and understood the information package. I would like to give my consent and participate in the survey. | radio, Required <table border="1"><tr><td>1</td><td>Agree (continue to survey)</td></tr><tr><td>2</td><td>No, I would not like to participate.</td></tr></table><br>Custom alignment: LH                                                                                                                                                                                                                                                                                                                                                                       | 1 | Agree (continue to survey) | 2              | No, I would not like to participate. |                     |                              |   |                     |               |   |                     |                    |   |                     |                         |   |                     |                |   |                     |       |
| 1                                                                      | Agree (continue to survey)                                                           |                                                                                                                                                                        |                                                                                                                                                                                                                                                                                                                                                                                                                                                                                                                                                                |   |                            |                |                                      |                     |                              |   |                     |               |   |                     |                    |   |                     |                         |   |                     |                |   |                     |       |
| 2                                                                      | No, I would not like to participate.                                                 |                                                                                                                                                                        |                                                                                                                                                                                                                                                                                                                                                                                                                                                                                                                                                                |   |                            |                |                                      |                     |                              |   |                     |               |   |                     |                    |   |                     |                         |   |                     |                |   |                     |       |
| 3                                                                      | clinic_name<br><br>Show the field ONLY if:<br>[consent] = '1'                        | What is the name of your clinic?                                                                                                                                       | notes                                                                                                                                                                                                                                                                                                                                                                                                                                                                                                                                                          |   |                            |                |                                      |                     |                              |   |                     |               |   |                     |                    |   |                     |                         |   |                     |                |   |                     |       |
| 4                                                                      | client_agerange<br><br>Show the field ONLY if:<br>[consent] = '1'                    | What is the age range of clients seen in your clinic? Select all that apply.                                                                                           | checkbox <table border="1"><tr><td>1</td><td>client_agerange__1</td><td>0-5</td></tr><tr><td>2</td><td>client_agerange__2</td><td>6-12</td></tr><tr><td>3</td><td>client_agerange__3</td><td>13-17</td></tr><tr><td>4</td><td>client_agerange__4</td><td>18+</td></tr></table>                                                                                                                                                                                                                                                                                 | 1 | client_agerange__1         | 0-5            | 2                                    | client_agerange__2  | 6-12                         | 3 | client_agerange__3  | 13-17         | 4 | client_agerange__4  | 18+                |   |                     |                         |   |                     |                |   |                     |       |
| 1                                                                      | client_agerange__1                                                                   | 0-5                                                                                                                                                                    |                                                                                                                                                                                                                                                                                                                                                                                                                                                                                                                                                                |   |                            |                |                                      |                     |                              |   |                     |               |   |                     |                    |   |                     |                         |   |                     |                |   |                     |       |
| 2                                                                      | client_agerange__2                                                                   | 6-12                                                                                                                                                                   |                                                                                                                                                                                                                                                                                                                                                                                                                                                                                                                                                                |   |                            |                |                                      |                     |                              |   |                     |               |   |                     |                    |   |                     |                         |   |                     |                |   |                     |       |
| 3                                                                      | client_agerange__3                                                                   | 13-17                                                                                                                                                                  |                                                                                                                                                                                                                                                                                                                                                                                                                                                                                                                                                                |   |                            |                |                                      |                     |                              |   |                     |               |   |                     |                    |   |                     |                         |   |                     |                |   |                     |       |
| 4                                                                      | client_agerange__4                                                                   | 18+                                                                                                                                                                    |                                                                                                                                                                                                                                                                                                                                                                                                                                                                                                                                                                |   |                            |                |                                      |                     |                              |   |                     |               |   |                     |                    |   |                     |                         |   |                     |                |   |                     |       |
| 5                                                                      | demo_setting<br><br>Show the field ONLY if:<br>[consent] = '1'                       | What type of clinic is it?                                                                                                                                             | checkbox <table border="1"><tr><td>1</td><td>demo_setting__1</td><td>Hospital</td></tr><tr><td>2</td><td>demo_setting__2</td><td>Community agency</td></tr><tr><td>3</td><td>demo_setting__3</td><td>University</td></tr><tr><td>4</td><td>demo_setting__4</td><td>Private practice</td></tr><tr><td>5</td><td>demo_setting__5</td><td>Other</td></tr></table>                                                                                                                                                                                                 | 1 | demo_setting__1            | Hospital       | 2                                    | demo_setting__2     | Community agency             | 3 | demo_setting__3     | University    | 4 | demo_setting__4     | Private practice   | 5 | demo_setting__5     | Other                   |   |                     |                |   |                     |       |
| 1                                                                      | demo_setting__1                                                                      | Hospital                                                                                                                                                               |                                                                                                                                                                                                                                                                                                                                                                                                                                                                                                                                                                |   |                            |                |                                      |                     |                              |   |                     |               |   |                     |                    |   |                     |                         |   |                     |                |   |                     |       |
| 2                                                                      | demo_setting__2                                                                      | Community agency                                                                                                                                                       |                                                                                                                                                                                                                                                                                                                                                                                                                                                                                                                                                                |   |                            |                |                                      |                     |                              |   |                     |               |   |                     |                    |   |                     |                         |   |                     |                |   |                     |       |
| 3                                                                      | demo_setting__3                                                                      | University                                                                                                                                                             |                                                                                                                                                                                                                                                                                                                                                                                                                                                                                                                                                                |   |                            |                |                                      |                     |                              |   |                     |               |   |                     |                    |   |                     |                         |   |                     |                |   |                     |       |
| 4                                                                      | demo_setting__4                                                                      | Private practice                                                                                                                                                       |                                                                                                                                                                                                                                                                                                                                                                                                                                                                                                                                                                |   |                            |                |                                      |                     |                              |   |                     |               |   |                     |                    |   |                     |                         |   |                     |                |   |                     |       |
| 5                                                                      | demo_setting__5                                                                      | Other                                                                                                                                                                  |                                                                                                                                                                                                                                                                                                                                                                                                                                                                                                                                                                |   |                            |                |                                      |                     |                              |   |                     |               |   |                     |                    |   |                     |                         |   |                     |                |   |                     |       |
| 6                                                                      | demo_settingother<br><br>Show the field ONLY if:<br>[demo_setting(5)] = '1'          | If other, please specify                                                                                                                                               | notes<br>Custom alignment: RH                                                                                                                                                                                                                                                                                                                                                                                                                                                                                                                                  |   |                            |                |                                      |                     |                              |   |                     |               |   |                     |                    |   |                     |                         |   |                     |                |   |                     |       |
| 7                                                                      | demo_disciplines<br><br>Show the field ONLY if:<br>[consent] = '1'                   | What disciplines provide services in your clinic?                                                                                                                      | checkbox <table border="1"><tr><td>1</td><td>demo_disciplines__1</td><td>Paediatricians</td></tr><tr><td>2</td><td>demo_disciplines__2</td><td>Speech-Language Pathologists</td></tr><tr><td>3</td><td>demo_disciplines__3</td><td>Psychologists</td></tr><tr><td>4</td><td>demo_disciplines__4</td><td>Neuropsychologists</td></tr><tr><td>5</td><td>demo_disciplines__5</td><td>Occupational Therapists</td></tr><tr><td>6</td><td>demo_disciplines__6</td><td>Social Workers</td></tr><tr><td>7</td><td>demo_disciplines__7</td><td>Other</td></tr></table> | 1 | demo_disciplines__1        | Paediatricians | 2                                    | demo_disciplines__2 | Speech-Language Pathologists | 3 | demo_disciplines__3 | Psychologists | 4 | demo_disciplines__4 | Neuropsychologists | 5 | demo_disciplines__5 | Occupational Therapists | 6 | demo_disciplines__6 | Social Workers | 7 | demo_disciplines__7 | Other |
| 1                                                                      | demo_disciplines__1                                                                  | Paediatricians                                                                                                                                                         |                                                                                                                                                                                                                                                                                                                                                                                                                                                                                                                                                                |   |                            |                |                                      |                     |                              |   |                     |               |   |                     |                    |   |                     |                         |   |                     |                |   |                     |       |
| 2                                                                      | demo_disciplines__2                                                                  | Speech-Language Pathologists                                                                                                                                           |                                                                                                                                                                                                                                                                                                                                                                                                                                                                                                                                                                |   |                            |                |                                      |                     |                              |   |                     |               |   |                     |                    |   |                     |                         |   |                     |                |   |                     |       |
| 3                                                                      | demo_disciplines__3                                                                  | Psychologists                                                                                                                                                          |                                                                                                                                                                                                                                                                                                                                                                                                                                                                                                                                                                |   |                            |                |                                      |                     |                              |   |                     |               |   |                     |                    |   |                     |                         |   |                     |                |   |                     |       |
| 4                                                                      | demo_disciplines__4                                                                  | Neuropsychologists                                                                                                                                                     |                                                                                                                                                                                                                                                                                                                                                                                                                                                                                                                                                                |   |                            |                |                                      |                     |                              |   |                     |               |   |                     |                    |   |                     |                         |   |                     |                |   |                     |       |
| 5                                                                      | demo_disciplines__5                                                                  | Occupational Therapists                                                                                                                                                |                                                                                                                                                                                                                                                                                                                                                                                                                                                                                                                                                                |   |                            |                |                                      |                     |                              |   |                     |               |   |                     |                    |   |                     |                         |   |                     |                |   |                     |       |
| 6                                                                      | demo_disciplines__6                                                                  | Social Workers                                                                                                                                                         |                                                                                                                                                                                                                                                                                                                                                                                                                                                                                                                                                                |   |                            |                |                                      |                     |                              |   |                     |               |   |                     |                    |   |                     |                         |   |                     |                |   |                     |       |
| 7                                                                      | demo_disciplines__7                                                                  | Other                                                                                                                                                                  |                                                                                                                                                                                                                                                                                                                                                                                                                                                                                                                                                                |   |                            |                |                                      |                     |                              |   |                     |               |   |                     |                    |   |                     |                         |   |                     |                |   |                     |       |
| 8                                                                      | demo_disciplinesothers<br><br>Show the field ONLY if:<br>[demo_disciplines(7)] = '1' | If other, please specify                                                                                                                                               | notes<br>Custom alignment: RH                                                                                                                                                                                                                                                                                                                                                                                                                                                                                                                                  |   |                            |                |                                      |                     |                              |   |                     |               |   |                     |                    |   |                     |                         |   |                     |                |   |                     |       |
| 9                                                                      | clinic_country<br><br>Show the field ONLY if:<br>[consent] = '1'                     | What country is the clinic in?                                                                                                                                         | text                                                                                                                                                                                                                                                                                                                                                                                                                                                                                                                                                           |   |                            |                |                                      |                     |                              |   |                     |               |   |                     |                    |   |                     |                         |   |                     |                |   |                     |       |
| 10                                                                     | diag_peryear<br><br>Show the field ONLY if:<br>[consent] = '1'                       | How many FASD assessments does your clinic perform per year?                                                                                                           | text<br>Custom alignment: RH                                                                                                                                                                                                                                                                                                                                                                                                                                                                                                                                   |   |                            |                |                                      |                     |                              |   |                     |               |   |                     |                    |   |                     |                         |   |                     |                |   |                     |       |
| 11                                                                     | waitlist<br><br>Show the field ONLY if:<br>[consent] = '1'                           | Does your clinic have a waitlist for FASD assessment?                                                                                                                  | yesno <table border="1"><tr><td>1</td><td>Yes</td></tr><tr><td>0</td><td>No</td></tr></table><br>Custom alignment: RH                                                                                                                                                                                                                                                                                                                                                                                                                                          | 1 | Yes                        | 0              | No                                   |                     |                              |   |                     |               |   |                     |                    |   |                     |                         |   |                     |                |   |                     |       |
| 1                                                                      | Yes                                                                                  |                                                                                                                                                                        |                                                                                                                                                                                                                                                                                                                                                                                                                                                                                                                                                                |   |                            |                |                                      |                     |                              |   |                     |               |   |                     |                    |   |                     |                         |   |                     |                |   |                     |       |
| 0                                                                      | No                                                                                   |                                                                                                                                                                        |                                                                                                                                                                                                                                                                                                                                                                                                                                                                                                                                                                |   |                            |                |                                      |                     |                              |   |                     |               |   |                     |                    |   |                     |                         |   |                     |                |   |                     |       |

|    |                                                                                  |                                                                                                                  |                                                                                                                                                                                                                                                                                                                                                                                                                                                                                                                                                                                                                                                                                                                                                                                                                                                                                                                                                                                                                                                                                                                                                                                            |   |                      |                                                            |    |                      |                                                      |   |                      |                                                           |   |                      |                                                                   |   |                      |                                        |   |                      |                                                                                                                  |   |                      |                                    |   |                      |          |   |            |                      |   |            |        |    |             |           |    |             |                                                                 |    |             |                   |    |             |                                                           |    |             |       |
|----|----------------------------------------------------------------------------------|------------------------------------------------------------------------------------------------------------------|--------------------------------------------------------------------------------------------------------------------------------------------------------------------------------------------------------------------------------------------------------------------------------------------------------------------------------------------------------------------------------------------------------------------------------------------------------------------------------------------------------------------------------------------------------------------------------------------------------------------------------------------------------------------------------------------------------------------------------------------------------------------------------------------------------------------------------------------------------------------------------------------------------------------------------------------------------------------------------------------------------------------------------------------------------------------------------------------------------------------------------------------------------------------------------------------|---|----------------------|------------------------------------------------------------|----|----------------------|------------------------------------------------------|---|----------------------|-----------------------------------------------------------|---|----------------------|-------------------------------------------------------------------|---|----------------------|----------------------------------------|---|----------------------|------------------------------------------------------------------------------------------------------------------|---|----------------------|------------------------------------|---|----------------------|----------|---|------------|----------------------|---|------------|--------|----|-------------|-----------|----|-------------|-----------------------------------------------------------------|----|-------------|-------------------|----|-------------|-----------------------------------------------------------|----|-------------|-------|
| 12 | waitlist_length<br>Show the field ONLY if:<br>[waitlist] = '1'                   | Approximately how long do clients have to wait for an assessment?                                                | text<br>Custom alignment: RH                                                                                                                                                                                                                                                                                                                                                                                                                                                                                                                                                                                                                                                                                                                                                                                                                                                                                                                                                                                                                                                                                                                                                               |   |                      |                                                            |    |                      |                                                      |   |                      |                                                           |   |                      |                                                                   |   |                      |                                        |   |                      |                                                                                                                  |   |                      |                                    |   |                      |          |   |            |                      |   |            |        |    |             |           |    |             |                                                                 |    |             |                   |    |             |                                                           |    |             |       |
| 13 | clinic_diagnostic<br>Show the field ONLY if:<br>[consent] = '1'                  | What diagnostic criteria does your clinic use to make a FASD diagnosis? Please select all the apply.             | checkbox, Required <table border="1"> <tr> <td>1</td> <td>clinic_diagnostic__1</td> <td>Australian Guide to FASD Diagnosis (Bower &amp; Elliott, 2016)</td> </tr> <tr> <td>2</td> <td>clinic_diagnostic__2</td> <td>Canadian Diagnostic Guideline (Chudley et al., 2005)</td> </tr> <tr> <td>3</td> <td>clinic_diagnostic__3</td> <td>Revised Canadian Diagnostic Guideline (Cook et al., 2016)</td> </tr> <tr> <td>4</td> <td>clinic_diagnostic__4</td> <td>United States Institute of Medicine Criteria (Hoyme et al., 2005)</td> </tr> <tr> <td>5</td> <td>clinic_diagnostic__5</td> <td>4-Digit Diagnostic Code (Astley, 2004)</td> </tr> <tr> <td>6</td> <td>clinic_diagnostic__6</td> <td>Centers for Disease Control and Prevention (Fetal Alcohol Syndrome: Guidelines for Referral and Diagnosis, 2004)</td> </tr> <tr> <td>7</td> <td>clinic_diagnostic__7</td> <td>Emory Clinic Diagnostic Guidelines</td> </tr> <tr> <td>8</td> <td>clinic_diagnostic__8</td> <td>Other</td> </tr> </table>                                                                                                                                                                                    | 1 | clinic_diagnostic__1 | Australian Guide to FASD Diagnosis (Bower & Elliott, 2016) | 2  | clinic_diagnostic__2 | Canadian Diagnostic Guideline (Chudley et al., 2005) | 3 | clinic_diagnostic__3 | Revised Canadian Diagnostic Guideline (Cook et al., 2016) | 4 | clinic_diagnostic__4 | United States Institute of Medicine Criteria (Hoyme et al., 2005) | 5 | clinic_diagnostic__5 | 4-Digit Diagnostic Code (Astley, 2004) | 6 | clinic_diagnostic__6 | Centers for Disease Control and Prevention (Fetal Alcohol Syndrome: Guidelines for Referral and Diagnosis, 2004) | 7 | clinic_diagnostic__7 | Emory Clinic Diagnostic Guidelines | 8 | clinic_diagnostic__8 | Other    |   |            |                      |   |            |        |    |             |           |    |             |                                                                 |    |             |                   |    |             |                                                           |    |             |       |
| 1  | clinic_diagnostic__1                                                             | Australian Guide to FASD Diagnosis (Bower & Elliott, 2016)                                                       |                                                                                                                                                                                                                                                                                                                                                                                                                                                                                                                                                                                                                                                                                                                                                                                                                                                                                                                                                                                                                                                                                                                                                                                            |   |                      |                                                            |    |                      |                                                      |   |                      |                                                           |   |                      |                                                                   |   |                      |                                        |   |                      |                                                                                                                  |   |                      |                                    |   |                      |          |   |            |                      |   |            |        |    |             |           |    |             |                                                                 |    |             |                   |    |             |                                                           |    |             |       |
| 2  | clinic_diagnostic__2                                                             | Canadian Diagnostic Guideline (Chudley et al., 2005)                                                             |                                                                                                                                                                                                                                                                                                                                                                                                                                                                                                                                                                                                                                                                                                                                                                                                                                                                                                                                                                                                                                                                                                                                                                                            |   |                      |                                                            |    |                      |                                                      |   |                      |                                                           |   |                      |                                                                   |   |                      |                                        |   |                      |                                                                                                                  |   |                      |                                    |   |                      |          |   |            |                      |   |            |        |    |             |           |    |             |                                                                 |    |             |                   |    |             |                                                           |    |             |       |
| 3  | clinic_diagnostic__3                                                             | Revised Canadian Diagnostic Guideline (Cook et al., 2016)                                                        |                                                                                                                                                                                                                                                                                                                                                                                                                                                                                                                                                                                                                                                                                                                                                                                                                                                                                                                                                                                                                                                                                                                                                                                            |   |                      |                                                            |    |                      |                                                      |   |                      |                                                           |   |                      |                                                                   |   |                      |                                        |   |                      |                                                                                                                  |   |                      |                                    |   |                      |          |   |            |                      |   |            |        |    |             |           |    |             |                                                                 |    |             |                   |    |             |                                                           |    |             |       |
| 4  | clinic_diagnostic__4                                                             | United States Institute of Medicine Criteria (Hoyme et al., 2005)                                                |                                                                                                                                                                                                                                                                                                                                                                                                                                                                                                                                                                                                                                                                                                                                                                                                                                                                                                                                                                                                                                                                                                                                                                                            |   |                      |                                                            |    |                      |                                                      |   |                      |                                                           |   |                      |                                                                   |   |                      |                                        |   |                      |                                                                                                                  |   |                      |                                    |   |                      |          |   |            |                      |   |            |        |    |             |           |    |             |                                                                 |    |             |                   |    |             |                                                           |    |             |       |
| 5  | clinic_diagnostic__5                                                             | 4-Digit Diagnostic Code (Astley, 2004)                                                                           |                                                                                                                                                                                                                                                                                                                                                                                                                                                                                                                                                                                                                                                                                                                                                                                                                                                                                                                                                                                                                                                                                                                                                                                            |   |                      |                                                            |    |                      |                                                      |   |                      |                                                           |   |                      |                                                                   |   |                      |                                        |   |                      |                                                                                                                  |   |                      |                                    |   |                      |          |   |            |                      |   |            |        |    |             |           |    |             |                                                                 |    |             |                   |    |             |                                                           |    |             |       |
| 6  | clinic_diagnostic__6                                                             | Centers for Disease Control and Prevention (Fetal Alcohol Syndrome: Guidelines for Referral and Diagnosis, 2004) |                                                                                                                                                                                                                                                                                                                                                                                                                                                                                                                                                                                                                                                                                                                                                                                                                                                                                                                                                                                                                                                                                                                                                                                            |   |                      |                                                            |    |                      |                                                      |   |                      |                                                           |   |                      |                                                                   |   |                      |                                        |   |                      |                                                                                                                  |   |                      |                                    |   |                      |          |   |            |                      |   |            |        |    |             |           |    |             |                                                                 |    |             |                   |    |             |                                                           |    |             |       |
| 7  | clinic_diagnostic__7                                                             | Emory Clinic Diagnostic Guidelines                                                                               |                                                                                                                                                                                                                                                                                                                                                                                                                                                                                                                                                                                                                                                                                                                                                                                                                                                                                                                                                                                                                                                                                                                                                                                            |   |                      |                                                            |    |                      |                                                      |   |                      |                                                           |   |                      |                                                                   |   |                      |                                        |   |                      |                                                                                                                  |   |                      |                                    |   |                      |          |   |            |                      |   |            |        |    |             |           |    |             |                                                                 |    |             |                   |    |             |                                                           |    |             |       |
| 8  | clinic_diagnostic__8                                                             | Other                                                                                                            |                                                                                                                                                                                                                                                                                                                                                                                                                                                                                                                                                                                                                                                                                                                                                                                                                                                                                                                                                                                                                                                                                                                                                                                            |   |                      |                                                            |    |                      |                                                      |   |                      |                                                           |   |                      |                                                                   |   |                      |                                        |   |                      |                                                                                                                  |   |                      |                                    |   |                      |          |   |            |                      |   |            |        |    |             |           |    |             |                                                                 |    |             |                   |    |             |                                                           |    |             |       |
| 14 | diagnostic_other<br>Show the field ONLY if:<br>[clinic_diagnostic(8)] = '1'      | If other, please specify                                                                                         | notes<br>Custom alignment: RH                                                                                                                                                                                                                                                                                                                                                                                                                                                                                                                                                                                                                                                                                                                                                                                                                                                                                                                                                                                                                                                                                                                                                              |   |                      |                                                            |    |                      |                                                      |   |                      |                                                           |   |                      |                                                                   |   |                      |                                        |   |                      |                                                                                                                  |   |                      |                                    |   |                      |          |   |            |                      |   |            |        |    |             |           |    |             |                                                                 |    |             |                   |    |             |                                                           |    |             |       |
| 15 | diagnostic_adapt<br>Show the field ONLY if:<br>[consent] = '1'                   | Does your clinic make any adaptations to the diagnostic criteria used?                                           | yesno <table border="1"> <tr> <td>1</td> <td>Yes</td> </tr> <tr> <td>0</td> <td>No</td> </tr> </table><br>Custom alignment: RH                                                                                                                                                                                                                                                                                                                                                                                                                                                                                                                                                                                                                                                                                                                                                                                                                                                                                                                                                                                                                                                             | 1 | Yes                  | 0                                                          | No |                      |                                                      |   |                      |                                                           |   |                      |                                                                   |   |                      |                                        |   |                      |                                                                                                                  |   |                      |                                    |   |                      |          |   |            |                      |   |            |        |    |             |           |    |             |                                                                 |    |             |                   |    |             |                                                           |    |             |       |
| 1  | Yes                                                                              |                                                                                                                  |                                                                                                                                                                                                                                                                                                                                                                                                                                                                                                                                                                                                                                                                                                                                                                                                                                                                                                                                                                                                                                                                                                                                                                                            |   |                      |                                                            |    |                      |                                                      |   |                      |                                                           |   |                      |                                                                   |   |                      |                                        |   |                      |                                                                                                                  |   |                      |                                    |   |                      |          |   |            |                      |   |            |        |    |             |           |    |             |                                                                 |    |             |                   |    |             |                                                           |    |             |       |
| 0  | No                                                                               |                                                                                                                  |                                                                                                                                                                                                                                                                                                                                                                                                                                                                                                                                                                                                                                                                                                                                                                                                                                                                                                                                                                                                                                                                                                                                                                                            |   |                      |                                                            |    |                      |                                                      |   |                      |                                                           |   |                      |                                                                   |   |                      |                                        |   |                      |                                                                                                                  |   |                      |                                    |   |                      |          |   |            |                      |   |            |        |    |             |           |    |             |                                                                 |    |             |                   |    |             |                                                           |    |             |       |
| 16 | diagnostic_adapt_describe<br>Show the field ONLY if:<br>[diagnostic_adapt] = '1' | If yes, please describe                                                                                          | notes<br>Custom alignment: RH                                                                                                                                                                                                                                                                                                                                                                                                                                                                                                                                                                                                                                                                                                                                                                                                                                                                                                                                                                                                                                                                                                                                                              |   |                      |                                                            |    |                      |                                                      |   |                      |                                                           |   |                      |                                                                   |   |                      |                                        |   |                      |                                                                                                                  |   |                      |                                    |   |                      |          |   |            |                      |   |            |        |    |             |           |    |             |                                                                 |    |             |                   |    |             |                                                           |    |             |       |
| 17 | domains<br>Show the field ONLY if:<br>[consent] = '1'                            | What domains are a part of your clinic's standard FASD assessment process? Please select all the apply.          | checkbox, Required <table border="1"> <tr> <td>0</td> <td>domains__0</td> <td>Prenatal Alcohol Exposure</td> </tr> <tr> <td>1</td> <td>domains__1</td> <td>Other Prenatal Exposures or Risks</td> </tr> <tr> <td>2</td> <td>domains__2</td> <td>Growth</td> </tr> <tr> <td>3</td> <td>domains__3</td> <td>Facial Features</td> </tr> <tr> <td>4</td> <td>domains__4</td> <td>Brain Structure/Neurology</td> </tr> <tr> <td>5</td> <td>domains__5</td> <td>Motor Skills</td> </tr> <tr> <td>6</td> <td>domains__6</td> <td>Cognition</td> </tr> <tr> <td>7</td> <td>domains__7</td> <td>Language</td> </tr> <tr> <td>8</td> <td>domains__8</td> <td>Academic Achievement</td> </tr> <tr> <td>9</td> <td>domains__9</td> <td>Memory</td> </tr> <tr> <td>10</td> <td>domains__10</td> <td>Attention</td> </tr> <tr> <td>11</td> <td>domains__11</td> <td>Executive Function, Including Impulse control and Hyperactivity</td> </tr> <tr> <td>12</td> <td>domains__12</td> <td>Affect Regulation</td> </tr> <tr> <td>13</td> <td>domains__13</td> <td>Adaptive Behaviour, Social Skills or Social Communication</td> </tr> <tr> <td>14</td> <td>domains__14</td> <td>Other</td> </tr> </table> | 0 | domains__0           | Prenatal Alcohol Exposure                                  | 1  | domains__1           | Other Prenatal Exposures or Risks                    | 2 | domains__2           | Growth                                                    | 3 | domains__3           | Facial Features                                                   | 4 | domains__4           | Brain Structure/Neurology              | 5 | domains__5           | Motor Skills                                                                                                     | 6 | domains__6           | Cognition                          | 7 | domains__7           | Language | 8 | domains__8 | Academic Achievement | 9 | domains__9 | Memory | 10 | domains__10 | Attention | 11 | domains__11 | Executive Function, Including Impulse control and Hyperactivity | 12 | domains__12 | Affect Regulation | 13 | domains__13 | Adaptive Behaviour, Social Skills or Social Communication | 14 | domains__14 | Other |
| 0  | domains__0                                                                       | Prenatal Alcohol Exposure                                                                                        |                                                                                                                                                                                                                                                                                                                                                                                                                                                                                                                                                                                                                                                                                                                                                                                                                                                                                                                                                                                                                                                                                                                                                                                            |   |                      |                                                            |    |                      |                                                      |   |                      |                                                           |   |                      |                                                                   |   |                      |                                        |   |                      |                                                                                                                  |   |                      |                                    |   |                      |          |   |            |                      |   |            |        |    |             |           |    |             |                                                                 |    |             |                   |    |             |                                                           |    |             |       |
| 1  | domains__1                                                                       | Other Prenatal Exposures or Risks                                                                                |                                                                                                                                                                                                                                                                                                                                                                                                                                                                                                                                                                                                                                                                                                                                                                                                                                                                                                                                                                                                                                                                                                                                                                                            |   |                      |                                                            |    |                      |                                                      |   |                      |                                                           |   |                      |                                                                   |   |                      |                                        |   |                      |                                                                                                                  |   |                      |                                    |   |                      |          |   |            |                      |   |            |        |    |             |           |    |             |                                                                 |    |             |                   |    |             |                                                           |    |             |       |
| 2  | domains__2                                                                       | Growth                                                                                                           |                                                                                                                                                                                                                                                                                                                                                                                                                                                                                                                                                                                                                                                                                                                                                                                                                                                                                                                                                                                                                                                                                                                                                                                            |   |                      |                                                            |    |                      |                                                      |   |                      |                                                           |   |                      |                                                                   |   |                      |                                        |   |                      |                                                                                                                  |   |                      |                                    |   |                      |          |   |            |                      |   |            |        |    |             |           |    |             |                                                                 |    |             |                   |    |             |                                                           |    |             |       |
| 3  | domains__3                                                                       | Facial Features                                                                                                  |                                                                                                                                                                                                                                                                                                                                                                                                                                                                                                                                                                                                                                                                                                                                                                                                                                                                                                                                                                                                                                                                                                                                                                                            |   |                      |                                                            |    |                      |                                                      |   |                      |                                                           |   |                      |                                                                   |   |                      |                                        |   |                      |                                                                                                                  |   |                      |                                    |   |                      |          |   |            |                      |   |            |        |    |             |           |    |             |                                                                 |    |             |                   |    |             |                                                           |    |             |       |
| 4  | domains__4                                                                       | Brain Structure/Neurology                                                                                        |                                                                                                                                                                                                                                                                                                                                                                                                                                                                                                                                                                                                                                                                                                                                                                                                                                                                                                                                                                                                                                                                                                                                                                                            |   |                      |                                                            |    |                      |                                                      |   |                      |                                                           |   |                      |                                                                   |   |                      |                                        |   |                      |                                                                                                                  |   |                      |                                    |   |                      |          |   |            |                      |   |            |        |    |             |           |    |             |                                                                 |    |             |                   |    |             |                                                           |    |             |       |
| 5  | domains__5                                                                       | Motor Skills                                                                                                     |                                                                                                                                                                                                                                                                                                                                                                                                                                                                                                                                                                                                                                                                                                                                                                                                                                                                                                                                                                                                                                                                                                                                                                                            |   |                      |                                                            |    |                      |                                                      |   |                      |                                                           |   |                      |                                                                   |   |                      |                                        |   |                      |                                                                                                                  |   |                      |                                    |   |                      |          |   |            |                      |   |            |        |    |             |           |    |             |                                                                 |    |             |                   |    |             |                                                           |    |             |       |
| 6  | domains__6                                                                       | Cognition                                                                                                        |                                                                                                                                                                                                                                                                                                                                                                                                                                                                                                                                                                                                                                                                                                                                                                                                                                                                                                                                                                                                                                                                                                                                                                                            |   |                      |                                                            |    |                      |                                                      |   |                      |                                                           |   |                      |                                                                   |   |                      |                                        |   |                      |                                                                                                                  |   |                      |                                    |   |                      |          |   |            |                      |   |            |        |    |             |           |    |             |                                                                 |    |             |                   |    |             |                                                           |    |             |       |
| 7  | domains__7                                                                       | Language                                                                                                         |                                                                                                                                                                                                                                                                                                                                                                                                                                                                                                                                                                                                                                                                                                                                                                                                                                                                                                                                                                                                                                                                                                                                                                                            |   |                      |                                                            |    |                      |                                                      |   |                      |                                                           |   |                      |                                                                   |   |                      |                                        |   |                      |                                                                                                                  |   |                      |                                    |   |                      |          |   |            |                      |   |            |        |    |             |           |    |             |                                                                 |    |             |                   |    |             |                                                           |    |             |       |
| 8  | domains__8                                                                       | Academic Achievement                                                                                             |                                                                                                                                                                                                                                                                                                                                                                                                                                                                                                                                                                                                                                                                                                                                                                                                                                                                                                                                                                                                                                                                                                                                                                                            |   |                      |                                                            |    |                      |                                                      |   |                      |                                                           |   |                      |                                                                   |   |                      |                                        |   |                      |                                                                                                                  |   |                      |                                    |   |                      |          |   |            |                      |   |            |        |    |             |           |    |             |                                                                 |    |             |                   |    |             |                                                           |    |             |       |
| 9  | domains__9                                                                       | Memory                                                                                                           |                                                                                                                                                                                                                                                                                                                                                                                                                                                                                                                                                                                                                                                                                                                                                                                                                                                                                                                                                                                                                                                                                                                                                                                            |   |                      |                                                            |    |                      |                                                      |   |                      |                                                           |   |                      |                                                                   |   |                      |                                        |   |                      |                                                                                                                  |   |                      |                                    |   |                      |          |   |            |                      |   |            |        |    |             |           |    |             |                                                                 |    |             |                   |    |             |                                                           |    |             |       |
| 10 | domains__10                                                                      | Attention                                                                                                        |                                                                                                                                                                                                                                                                                                                                                                                                                                                                                                                                                                                                                                                                                                                                                                                                                                                                                                                                                                                                                                                                                                                                                                                            |   |                      |                                                            |    |                      |                                                      |   |                      |                                                           |   |                      |                                                                   |   |                      |                                        |   |                      |                                                                                                                  |   |                      |                                    |   |                      |          |   |            |                      |   |            |        |    |             |           |    |             |                                                                 |    |             |                   |    |             |                                                           |    |             |       |
| 11 | domains__11                                                                      | Executive Function, Including Impulse control and Hyperactivity                                                  |                                                                                                                                                                                                                                                                                                                                                                                                                                                                                                                                                                                                                                                                                                                                                                                                                                                                                                                                                                                                                                                                                                                                                                                            |   |                      |                                                            |    |                      |                                                      |   |                      |                                                           |   |                      |                                                                   |   |                      |                                        |   |                      |                                                                                                                  |   |                      |                                    |   |                      |          |   |            |                      |   |            |        |    |             |           |    |             |                                                                 |    |             |                   |    |             |                                                           |    |             |       |
| 12 | domains__12                                                                      | Affect Regulation                                                                                                |                                                                                                                                                                                                                                                                                                                                                                                                                                                                                                                                                                                                                                                                                                                                                                                                                                                                                                                                                                                                                                                                                                                                                                                            |   |                      |                                                            |    |                      |                                                      |   |                      |                                                           |   |                      |                                                                   |   |                      |                                        |   |                      |                                                                                                                  |   |                      |                                    |   |                      |          |   |            |                      |   |            |        |    |             |           |    |             |                                                                 |    |             |                   |    |             |                                                           |    |             |       |
| 13 | domains__13                                                                      | Adaptive Behaviour, Social Skills or Social Communication                                                        |                                                                                                                                                                                                                                                                                                                                                                                                                                                                                                                                                                                                                                                                                                                                                                                                                                                                                                                                                                                                                                                                                                                                                                                            |   |                      |                                                            |    |                      |                                                      |   |                      |                                                           |   |                      |                                                                   |   |                      |                                        |   |                      |                                                                                                                  |   |                      |                                    |   |                      |          |   |            |                      |   |            |        |    |             |           |    |             |                                                                 |    |             |                   |    |             |                                                           |    |             |       |
| 14 | domains__14                                                                      | Other                                                                                                            |                                                                                                                                                                                                                                                                                                                                                                                                                                                                                                                                                                                                                                                                                                                                                                                                                                                                                                                                                                                                                                                                                                                                                                                            |   |                      |                                                            |    |                      |                                                      |   |                      |                                                           |   |                      |                                                                   |   |                      |                                        |   |                      |                                                                                                                  |   |                      |                                    |   |                      |          |   |            |                      |   |            |        |    |             |           |    |             |                                                                 |    |             |                   |    |             |                                                           |    |             |       |

|    |                                                                                                 |                                                                                                                                                                                                                                       |                                                                                                                                                                                                                                                                                                                                                                                                                                                                                                                                                                                                                                                                                                                                                                                                        |   |                           |                    |   |                           |             |   |                           |                                             |   |                           |                                                                    |   |                           |                                 |   |                           |                       |   |                           |                                                                    |   |                           |       |
|----|-------------------------------------------------------------------------------------------------|---------------------------------------------------------------------------------------------------------------------------------------------------------------------------------------------------------------------------------------|--------------------------------------------------------------------------------------------------------------------------------------------------------------------------------------------------------------------------------------------------------------------------------------------------------------------------------------------------------------------------------------------------------------------------------------------------------------------------------------------------------------------------------------------------------------------------------------------------------------------------------------------------------------------------------------------------------------------------------------------------------------------------------------------------------|---|---------------------------|--------------------|---|---------------------------|-------------|---|---------------------------|---------------------------------------------|---|---------------------------|--------------------------------------------------------------------|---|---------------------------|---------------------------------|---|---------------------------|-----------------------|---|---------------------------|--------------------------------------------------------------------|---|---------------------------|-------|
| 18 | <p>tools_alcohol_exposure</p> <p>Show the field ONLY if:<br/>[domains(0)] = '1'</p>             | <p>Section Header: <i>What assessment tools do you use to assess each of these domains for FASD assessments and diagnosis? Please select all that apply.</i></p> <p>Prenatal Alcohol Exposure</p> <p>Please select all that apply</p> | <p>checkbox, Required</p> <table border="1"> <tr> <td>1</td> <td>tools_alcohol_exposure__1</td> <td>Clinical Judgement</td> </tr> <tr> <td>2</td> <td>tools_alcohol_exposure__2</td> <td>Observation</td> </tr> <tr> <td>3</td> <td>tools_alcohol_exposure__3</td> <td>Interview</td> </tr> <tr> <td>4</td> <td>tools_alcohol_exposure__4</td> <td>Alcohol Use Disorders Identification Tests - Consumption (AUDIT-C)</td> </tr> <tr> <td>5</td> <td>tools_alcohol_exposure__5</td> <td>TWEAK</td> </tr> <tr> <td>6</td> <td>tools_alcohol_exposure__6</td> <td>T-ACE</td> </tr> <tr> <td>7</td> <td>tools_alcohol_exposure__7</td> <td>Alcohol, Smoking and Substance Involvement Screening Test (ASSIST)</td> </tr> <tr> <td>0</td> <td>tools_alcohol_exposure__0</td> <td>Other</td> </tr> </table> | 1 | tools_alcohol_exposure__1 | Clinical Judgement | 2 | tools_alcohol_exposure__2 | Observation | 3 | tools_alcohol_exposure__3 | Interview                                   | 4 | tools_alcohol_exposure__4 | Alcohol Use Disorders Identification Tests - Consumption (AUDIT-C) | 5 | tools_alcohol_exposure__5 | TWEAK                           | 6 | tools_alcohol_exposure__6 | T-ACE                 | 7 | tools_alcohol_exposure__7 | Alcohol, Smoking and Substance Involvement Screening Test (ASSIST) | 0 | tools_alcohol_exposure__0 | Other |
| 1  | tools_alcohol_exposure__1                                                                       | Clinical Judgement                                                                                                                                                                                                                    |                                                                                                                                                                                                                                                                                                                                                                                                                                                                                                                                                                                                                                                                                                                                                                                                        |   |                           |                    |   |                           |             |   |                           |                                             |   |                           |                                                                    |   |                           |                                 |   |                           |                       |   |                           |                                                                    |   |                           |       |
| 2  | tools_alcohol_exposure__2                                                                       | Observation                                                                                                                                                                                                                           |                                                                                                                                                                                                                                                                                                                                                                                                                                                                                                                                                                                                                                                                                                                                                                                                        |   |                           |                    |   |                           |             |   |                           |                                             |   |                           |                                                                    |   |                           |                                 |   |                           |                       |   |                           |                                                                    |   |                           |       |
| 3  | tools_alcohol_exposure__3                                                                       | Interview                                                                                                                                                                                                                             |                                                                                                                                                                                                                                                                                                                                                                                                                                                                                                                                                                                                                                                                                                                                                                                                        |   |                           |                    |   |                           |             |   |                           |                                             |   |                           |                                                                    |   |                           |                                 |   |                           |                       |   |                           |                                                                    |   |                           |       |
| 4  | tools_alcohol_exposure__4                                                                       | Alcohol Use Disorders Identification Tests - Consumption (AUDIT-C)                                                                                                                                                                    |                                                                                                                                                                                                                                                                                                                                                                                                                                                                                                                                                                                                                                                                                                                                                                                                        |   |                           |                    |   |                           |             |   |                           |                                             |   |                           |                                                                    |   |                           |                                 |   |                           |                       |   |                           |                                                                    |   |                           |       |
| 5  | tools_alcohol_exposure__5                                                                       | TWEAK                                                                                                                                                                                                                                 |                                                                                                                                                                                                                                                                                                                                                                                                                                                                                                                                                                                                                                                                                                                                                                                                        |   |                           |                    |   |                           |             |   |                           |                                             |   |                           |                                                                    |   |                           |                                 |   |                           |                       |   |                           |                                                                    |   |                           |       |
| 6  | tools_alcohol_exposure__6                                                                       | T-ACE                                                                                                                                                                                                                                 |                                                                                                                                                                                                                                                                                                                                                                                                                                                                                                                                                                                                                                                                                                                                                                                                        |   |                           |                    |   |                           |             |   |                           |                                             |   |                           |                                                                    |   |                           |                                 |   |                           |                       |   |                           |                                                                    |   |                           |       |
| 7  | tools_alcohol_exposure__7                                                                       | Alcohol, Smoking and Substance Involvement Screening Test (ASSIST)                                                                                                                                                                    |                                                                                                                                                                                                                                                                                                                                                                                                                                                                                                                                                                                                                                                                                                                                                                                                        |   |                           |                    |   |                           |             |   |                           |                                             |   |                           |                                                                    |   |                           |                                 |   |                           |                       |   |                           |                                                                    |   |                           |       |
| 0  | tools_alcohol_exposure__0                                                                       | Other                                                                                                                                                                                                                                 |                                                                                                                                                                                                                                                                                                                                                                                                                                                                                                                                                                                                                                                                                                                                                                                                        |   |                           |                    |   |                           |             |   |                           |                                             |   |                           |                                                                    |   |                           |                                 |   |                           |                       |   |                           |                                                                    |   |                           |       |
| 19 | <p>tools_alcohol_other</p> <p>Show the field ONLY if:<br/>[tools_alcohol_exposure(0)] = '1'</p> | If other, please specify                                                                                                                                                                                                              | notes                                                                                                                                                                                                                                                                                                                                                                                                                                                                                                                                                                                                                                                                                                                                                                                                  |   |                           |                    |   |                           |             |   |                           |                                             |   |                           |                                                                    |   |                           |                                 |   |                           |                       |   |                           |                                                                    |   |                           |       |
| 20 | <p>tools_other_exposure</p> <p>Show the field ONLY if:<br/>[domains(1)] = '1'</p>               | <p>Other Prenatal Exposures and Risks</p> <p>Please select all that apply</p>                                                                                                                                                         | <p>checkbox, Required</p> <table border="1"> <tr> <td>1</td> <td>tools_other_exposure__1</td> <td>Clinical Judgement</td> </tr> <tr> <td>2</td> <td>tools_other_exposure__2</td> <td>Observation</td> </tr> <tr> <td>3</td> <td>tools_other_exposure__3</td> <td>Interview</td> </tr> <tr> <td>0</td> <td>tools_other_exposure__0</td> <td>Other</td> </tr> </table>                                                                                                                                                                                                                                                                                                                                                                                                                                   | 1 | tools_other_exposure__1   | Clinical Judgement | 2 | tools_other_exposure__2   | Observation | 3 | tools_other_exposure__3   | Interview                                   | 0 | tools_other_exposure__0   | Other                                                              |   |                           |                                 |   |                           |                       |   |                           |                                                                    |   |                           |       |
| 1  | tools_other_exposure__1                                                                         | Clinical Judgement                                                                                                                                                                                                                    |                                                                                                                                                                                                                                                                                                                                                                                                                                                                                                                                                                                                                                                                                                                                                                                                        |   |                           |                    |   |                           |             |   |                           |                                             |   |                           |                                                                    |   |                           |                                 |   |                           |                       |   |                           |                                                                    |   |                           |       |
| 2  | tools_other_exposure__2                                                                         | Observation                                                                                                                                                                                                                           |                                                                                                                                                                                                                                                                                                                                                                                                                                                                                                                                                                                                                                                                                                                                                                                                        |   |                           |                    |   |                           |             |   |                           |                                             |   |                           |                                                                    |   |                           |                                 |   |                           |                       |   |                           |                                                                    |   |                           |       |
| 3  | tools_other_exposure__3                                                                         | Interview                                                                                                                                                                                                                             |                                                                                                                                                                                                                                                                                                                                                                                                                                                                                                                                                                                                                                                                                                                                                                                                        |   |                           |                    |   |                           |             |   |                           |                                             |   |                           |                                                                    |   |                           |                                 |   |                           |                       |   |                           |                                                                    |   |                           |       |
| 0  | tools_other_exposure__0                                                                         | Other                                                                                                                                                                                                                                 |                                                                                                                                                                                                                                                                                                                                                                                                                                                                                                                                                                                                                                                                                                                                                                                                        |   |                           |                    |   |                           |             |   |                           |                                             |   |                           |                                                                    |   |                           |                                 |   |                           |                       |   |                           |                                                                    |   |                           |       |
| 21 | <p>tools_exposure_other</p> <p>Show the field ONLY if:<br/>[tools_other_exposure(0)] = '1'</p>  | If other, please specify                                                                                                                                                                                                              | notes                                                                                                                                                                                                                                                                                                                                                                                                                                                                                                                                                                                                                                                                                                                                                                                                  |   |                           |                    |   |                           |             |   |                           |                                             |   |                           |                                                                    |   |                           |                                 |   |                           |                       |   |                           |                                                                    |   |                           |       |
| 22 | <p>tools_growth</p> <p>Show the field ONLY if:<br/>[domains(2)] = '1'</p>                       | <p>Growth</p> <p>Please select all that apply</p>                                                                                                                                                                                     | <p>checkbox, Required</p> <table border="1"> <tr> <td>1</td> <td>tools_growth__1</td> <td>Clinical Judgement</td> </tr> <tr> <td>2</td> <td>tools_growth__2</td> <td>Observation</td> </tr> <tr> <td>3</td> <td>tools_growth__3</td> <td>Birth Growth</td> </tr> <tr> <td>4</td> <td>tools_growth__4</td> <td>Postnatal Growth</td> </tr> <tr> <td>5</td> <td>tools_growth__5</td> <td>Parental Height</td> </tr> <tr> <td>0</td> <td>tools_growth__0</td> <td>Other</td> </tr> </table>                                                                                                                                                                                                                                                                                                               | 1 | tools_growth__1           | Clinical Judgement | 2 | tools_growth__2           | Observation | 3 | tools_growth__3           | Birth Growth                                | 4 | tools_growth__4           | Postnatal Growth                                                   | 5 | tools_growth__5           | Parental Height                 | 0 | tools_growth__0           | Other                 |   |                           |                                                                    |   |                           |       |
| 1  | tools_growth__1                                                                                 | Clinical Judgement                                                                                                                                                                                                                    |                                                                                                                                                                                                                                                                                                                                                                                                                                                                                                                                                                                                                                                                                                                                                                                                        |   |                           |                    |   |                           |             |   |                           |                                             |   |                           |                                                                    |   |                           |                                 |   |                           |                       |   |                           |                                                                    |   |                           |       |
| 2  | tools_growth__2                                                                                 | Observation                                                                                                                                                                                                                           |                                                                                                                                                                                                                                                                                                                                                                                                                                                                                                                                                                                                                                                                                                                                                                                                        |   |                           |                    |   |                           |             |   |                           |                                             |   |                           |                                                                    |   |                           |                                 |   |                           |                       |   |                           |                                                                    |   |                           |       |
| 3  | tools_growth__3                                                                                 | Birth Growth                                                                                                                                                                                                                          |                                                                                                                                                                                                                                                                                                                                                                                                                                                                                                                                                                                                                                                                                                                                                                                                        |   |                           |                    |   |                           |             |   |                           |                                             |   |                           |                                                                    |   |                           |                                 |   |                           |                       |   |                           |                                                                    |   |                           |       |
| 4  | tools_growth__4                                                                                 | Postnatal Growth                                                                                                                                                                                                                      |                                                                                                                                                                                                                                                                                                                                                                                                                                                                                                                                                                                                                                                                                                                                                                                                        |   |                           |                    |   |                           |             |   |                           |                                             |   |                           |                                                                    |   |                           |                                 |   |                           |                       |   |                           |                                                                    |   |                           |       |
| 5  | tools_growth__5                                                                                 | Parental Height                                                                                                                                                                                                                       |                                                                                                                                                                                                                                                                                                                                                                                                                                                                                                                                                                                                                                                                                                                                                                                                        |   |                           |                    |   |                           |             |   |                           |                                             |   |                           |                                                                    |   |                           |                                 |   |                           |                       |   |                           |                                                                    |   |                           |       |
| 0  | tools_growth__0                                                                                 | Other                                                                                                                                                                                                                                 |                                                                                                                                                                                                                                                                                                                                                                                                                                                                                                                                                                                                                                                                                                                                                                                                        |   |                           |                    |   |                           |             |   |                           |                                             |   |                           |                                                                    |   |                           |                                 |   |                           |                       |   |                           |                                                                    |   |                           |       |
| 23 | <p>tools_growth_other</p> <p>Show the field ONLY if:<br/>[tools_growth(0)] = '1'</p>            | If other, please specify                                                                                                                                                                                                              | notes                                                                                                                                                                                                                                                                                                                                                                                                                                                                                                                                                                                                                                                                                                                                                                                                  |   |                           |                    |   |                           |             |   |                           |                                             |   |                           |                                                                    |   |                           |                                 |   |                           |                       |   |                           |                                                                    |   |                           |       |
| 24 | <p>tools_facial_features</p> <p>Show the field ONLY if:<br/>[domains(3)] = '1'</p>              | <p>Facial Features</p> <p>Please select all that apply</p>                                                                                                                                                                            | <p>checkbox, Required</p> <table border="1"> <tr> <td>1</td> <td>tools_facial_features__1</td> <td>Clinical Judgement</td> </tr> <tr> <td>2</td> <td>tools_facial_features__2</td> <td>Observation</td> </tr> <tr> <td>3</td> <td>tools_facial_features__3</td> <td>University of Washington Lip-Philtrum Guide</td> </tr> <tr> <td>4</td> <td>tools_facial_features__4</td> <td>FAS Facial Photographic Software</td> </tr> <tr> <td>5</td> <td>tools_facial_features__5</td> <td>Palpebral Fissure Length Charts</td> </tr> <tr> <td>6</td> <td>tools_facial_features__6</td> <td>3D Facial Photography</td> </tr> <tr> <td>0</td> <td>tools_facial_features__0</td> <td>Other</td> </tr> </table>                                                                                                   | 1 | tools_facial_features__1  | Clinical Judgement | 2 | tools_facial_features__2  | Observation | 3 | tools_facial_features__3  | University of Washington Lip-Philtrum Guide | 4 | tools_facial_features__4  | FAS Facial Photographic Software                                   | 5 | tools_facial_features__5  | Palpebral Fissure Length Charts | 6 | tools_facial_features__6  | 3D Facial Photography | 0 | tools_facial_features__0  | Other                                                              |   |                           |       |
| 1  | tools_facial_features__1                                                                        | Clinical Judgement                                                                                                                                                                                                                    |                                                                                                                                                                                                                                                                                                                                                                                                                                                                                                                                                                                                                                                                                                                                                                                                        |   |                           |                    |   |                           |             |   |                           |                                             |   |                           |                                                                    |   |                           |                                 |   |                           |                       |   |                           |                                                                    |   |                           |       |
| 2  | tools_facial_features__2                                                                        | Observation                                                                                                                                                                                                                           |                                                                                                                                                                                                                                                                                                                                                                                                                                                                                                                                                                                                                                                                                                                                                                                                        |   |                           |                    |   |                           |             |   |                           |                                             |   |                           |                                                                    |   |                           |                                 |   |                           |                       |   |                           |                                                                    |   |                           |       |
| 3  | tools_facial_features__3                                                                        | University of Washington Lip-Philtrum Guide                                                                                                                                                                                           |                                                                                                                                                                                                                                                                                                                                                                                                                                                                                                                                                                                                                                                                                                                                                                                                        |   |                           |                    |   |                           |             |   |                           |                                             |   |                           |                                                                    |   |                           |                                 |   |                           |                       |   |                           |                                                                    |   |                           |       |
| 4  | tools_facial_features__4                                                                        | FAS Facial Photographic Software                                                                                                                                                                                                      |                                                                                                                                                                                                                                                                                                                                                                                                                                                                                                                                                                                                                                                                                                                                                                                                        |   |                           |                    |   |                           |             |   |                           |                                             |   |                           |                                                                    |   |                           |                                 |   |                           |                       |   |                           |                                                                    |   |                           |       |
| 5  | tools_facial_features__5                                                                        | Palpebral Fissure Length Charts                                                                                                                                                                                                       |                                                                                                                                                                                                                                                                                                                                                                                                                                                                                                                                                                                                                                                                                                                                                                                                        |   |                           |                    |   |                           |             |   |                           |                                             |   |                           |                                                                    |   |                           |                                 |   |                           |                       |   |                           |                                                                    |   |                           |       |
| 6  | tools_facial_features__6                                                                        | 3D Facial Photography                                                                                                                                                                                                                 |                                                                                                                                                                                                                                                                                                                                                                                                                                                                                                                                                                                                                                                                                                                                                                                                        |   |                           |                    |   |                           |             |   |                           |                                             |   |                           |                                                                    |   |                           |                                 |   |                           |                       |   |                           |                                                                    |   |                           |       |
| 0  | tools_facial_features__0                                                                        | Other                                                                                                                                                                                                                                 |                                                                                                                                                                                                                                                                                                                                                                                                                                                                                                                                                                                                                                                                                                                                                                                                        |   |                           |                    |   |                           |             |   |                           |                                             |   |                           |                                                                    |   |                           |                                 |   |                           |                       |   |                           |                                                                    |   |                           |       |
| 25 | <p>tools_face_other</p> <p>Show the field ONLY if:<br/>[tools_facial_features(0)] = '1'</p>     | If other, please specify                                                                                                                                                                                                              | notes                                                                                                                                                                                                                                                                                                                                                                                                                                                                                                                                                                                                                                                                                                                                                                                                  |   |                           |                    |   |                           |             |   |                           |                                             |   |                           |                                                                    |   |                           |                                 |   |                           |                       |   |                           |                                                                    |   |                           |       |

|    |                                                                                  |                                                                                                  |                                                                                                                                                                                                                                                                                                                                                                                                                                                                                                                                                                                                                                                                                                                                                                                                                         |   |                          |                    |   |                          |             |   |                          |                                                |   |                          |               |   |                          |                                |   |                          |                                                     |   |                          |                                                          |   |                          |       |
|----|----------------------------------------------------------------------------------|--------------------------------------------------------------------------------------------------|-------------------------------------------------------------------------------------------------------------------------------------------------------------------------------------------------------------------------------------------------------------------------------------------------------------------------------------------------------------------------------------------------------------------------------------------------------------------------------------------------------------------------------------------------------------------------------------------------------------------------------------------------------------------------------------------------------------------------------------------------------------------------------------------------------------------------|---|--------------------------|--------------------|---|--------------------------|-------------|---|--------------------------|------------------------------------------------|---|--------------------------|---------------|---|--------------------------|--------------------------------|---|--------------------------|-----------------------------------------------------|---|--------------------------|----------------------------------------------------------|---|--------------------------|-------|
| 26 | tools_brain_neurology<br>Show the field ONLY if:<br>[domains(4)] = '1'           | Brain Structure/Neurology<br>Please select all that apply                                        | checkbox, Required <table border="1"> <tr> <td>1</td> <td>tools_brain_neurology__1</td> <td>Clinical Judgement</td> </tr> <tr> <td>2</td> <td>tools_brain_neurology__2</td> <td>Observation</td> </tr> <tr> <td>3</td> <td>tools_brain_neurology__3</td> <td>Birth Occipitofrontal Head Circumference (OFC)</td> </tr> <tr> <td>4</td> <td>tools_brain_neurology__4</td> <td>Postnatal OFC</td> </tr> <tr> <td>5</td> <td>tools_brain_neurology__5</td> <td>Evidence of seizure disorder</td> </tr> <tr> <td>6</td> <td>tools_brain_neurology__6</td> <td>Evidence of other neurological diagnoses</td> </tr> <tr> <td>7</td> <td>tools_brain_neurology__7</td> <td>Brain imaging to identify structural brain abnormalities</td> </tr> <tr> <td>0</td> <td>tools_brain_neurology__0</td> <td>Other</td> </tr> </table> | 1 | tools_brain_neurology__1 | Clinical Judgement | 2 | tools_brain_neurology__2 | Observation | 3 | tools_brain_neurology__3 | Birth Occipitofrontal Head Circumference (OFC) | 4 | tools_brain_neurology__4 | Postnatal OFC | 5 | tools_brain_neurology__5 | Evidence of seizure disorder   | 6 | tools_brain_neurology__6 | Evidence of other neurological diagnoses            | 7 | tools_brain_neurology__7 | Brain imaging to identify structural brain abnormalities | 0 | tools_brain_neurology__0 | Other |
| 1  | tools_brain_neurology__1                                                         | Clinical Judgement                                                                               |                                                                                                                                                                                                                                                                                                                                                                                                                                                                                                                                                                                                                                                                                                                                                                                                                         |   |                          |                    |   |                          |             |   |                          |                                                |   |                          |               |   |                          |                                |   |                          |                                                     |   |                          |                                                          |   |                          |       |
| 2  | tools_brain_neurology__2                                                         | Observation                                                                                      |                                                                                                                                                                                                                                                                                                                                                                                                                                                                                                                                                                                                                                                                                                                                                                                                                         |   |                          |                    |   |                          |             |   |                          |                                                |   |                          |               |   |                          |                                |   |                          |                                                     |   |                          |                                                          |   |                          |       |
| 3  | tools_brain_neurology__3                                                         | Birth Occipitofrontal Head Circumference (OFC)                                                   |                                                                                                                                                                                                                                                                                                                                                                                                                                                                                                                                                                                                                                                                                                                                                                                                                         |   |                          |                    |   |                          |             |   |                          |                                                |   |                          |               |   |                          |                                |   |                          |                                                     |   |                          |                                                          |   |                          |       |
| 4  | tools_brain_neurology__4                                                         | Postnatal OFC                                                                                    |                                                                                                                                                                                                                                                                                                                                                                                                                                                                                                                                                                                                                                                                                                                                                                                                                         |   |                          |                    |   |                          |             |   |                          |                                                |   |                          |               |   |                          |                                |   |                          |                                                     |   |                          |                                                          |   |                          |       |
| 5  | tools_brain_neurology__5                                                         | Evidence of seizure disorder                                                                     |                                                                                                                                                                                                                                                                                                                                                                                                                                                                                                                                                                                                                                                                                                                                                                                                                         |   |                          |                    |   |                          |             |   |                          |                                                |   |                          |               |   |                          |                                |   |                          |                                                     |   |                          |                                                          |   |                          |       |
| 6  | tools_brain_neurology__6                                                         | Evidence of other neurological diagnoses                                                         |                                                                                                                                                                                                                                                                                                                                                                                                                                                                                                                                                                                                                                                                                                                                                                                                                         |   |                          |                    |   |                          |             |   |                          |                                                |   |                          |               |   |                          |                                |   |                          |                                                     |   |                          |                                                          |   |                          |       |
| 7  | tools_brain_neurology__7                                                         | Brain imaging to identify structural brain abnormalities                                         |                                                                                                                                                                                                                                                                                                                                                                                                                                                                                                                                                                                                                                                                                                                                                                                                                         |   |                          |                    |   |                          |             |   |                          |                                                |   |                          |               |   |                          |                                |   |                          |                                                     |   |                          |                                                          |   |                          |       |
| 0  | tools_brain_neurology__0                                                         | Other                                                                                            |                                                                                                                                                                                                                                                                                                                                                                                                                                                                                                                                                                                                                                                                                                                                                                                                                         |   |                          |                    |   |                          |             |   |                          |                                                |   |                          |               |   |                          |                                |   |                          |                                                     |   |                          |                                                          |   |                          |       |
| 27 | tools_brain_other<br>Show the field ONLY if:<br>[tools_brain_neurology(0)] = '1' | If other, please specify                                                                         | notes                                                                                                                                                                                                                                                                                                                                                                                                                                                                                                                                                                                                                                                                                                                                                                                                                   |   |                          |                    |   |                          |             |   |                          |                                                |   |                          |               |   |                          |                                |   |                          |                                                     |   |                          |                                                          |   |                          |       |
| 28 | tools_motor<br>Show the field ONLY if:<br>[domains(5)] = '1'                     | Motor Skills<br>Please select all that apply                                                     | checkbox, Required <table border="1"> <tr> <td>1</td> <td>tools_motor__1</td> <td>Clinical Judgement</td> </tr> <tr> <td>2</td> <td>tools_motor__2</td> <td>Observation</td> </tr> <tr> <td>3</td> <td>tools_motor__3</td> <td>Previous non-FASD diagnoses</td> </tr> <tr> <td>4</td> <td>tools_motor__4</td> <td>Bayley</td> </tr> <tr> <td>5</td> <td>tools_motor__5</td> <td>Visual-Motor Integration (VMI)</td> </tr> <tr> <td>6</td> <td>tools_motor__6</td> <td>Bruininks-Oseretsky Test of Motor Proficiency (BOT)</td> </tr> <tr> <td>0</td> <td>tools_motor__0</td> <td>Other</td> </tr> </table>                                                                                                                                                                                                              | 1 | tools_motor__1           | Clinical Judgement | 2 | tools_motor__2           | Observation | 3 | tools_motor__3           | Previous non-FASD diagnoses                    | 4 | tools_motor__4           | Bayley        | 5 | tools_motor__5           | Visual-Motor Integration (VMI) | 6 | tools_motor__6           | Bruininks-Oseretsky Test of Motor Proficiency (BOT) | 0 | tools_motor__0           | Other                                                    |   |                          |       |
| 1  | tools_motor__1                                                                   | Clinical Judgement                                                                               |                                                                                                                                                                                                                                                                                                                                                                                                                                                                                                                                                                                                                                                                                                                                                                                                                         |   |                          |                    |   |                          |             |   |                          |                                                |   |                          |               |   |                          |                                |   |                          |                                                     |   |                          |                                                          |   |                          |       |
| 2  | tools_motor__2                                                                   | Observation                                                                                      |                                                                                                                                                                                                                                                                                                                                                                                                                                                                                                                                                                                                                                                                                                                                                                                                                         |   |                          |                    |   |                          |             |   |                          |                                                |   |                          |               |   |                          |                                |   |                          |                                                     |   |                          |                                                          |   |                          |       |
| 3  | tools_motor__3                                                                   | Previous non-FASD diagnoses                                                                      |                                                                                                                                                                                                                                                                                                                                                                                                                                                                                                                                                                                                                                                                                                                                                                                                                         |   |                          |                    |   |                          |             |   |                          |                                                |   |                          |               |   |                          |                                |   |                          |                                                     |   |                          |                                                          |   |                          |       |
| 4  | tools_motor__4                                                                   | Bayley                                                                                           |                                                                                                                                                                                                                                                                                                                                                                                                                                                                                                                                                                                                                                                                                                                                                                                                                         |   |                          |                    |   |                          |             |   |                          |                                                |   |                          |               |   |                          |                                |   |                          |                                                     |   |                          |                                                          |   |                          |       |
| 5  | tools_motor__5                                                                   | Visual-Motor Integration (VMI)                                                                   |                                                                                                                                                                                                                                                                                                                                                                                                                                                                                                                                                                                                                                                                                                                                                                                                                         |   |                          |                    |   |                          |             |   |                          |                                                |   |                          |               |   |                          |                                |   |                          |                                                     |   |                          |                                                          |   |                          |       |
| 6  | tools_motor__6                                                                   | Bruininks-Oseretsky Test of Motor Proficiency (BOT)                                              |                                                                                                                                                                                                                                                                                                                                                                                                                                                                                                                                                                                                                                                                                                                                                                                                                         |   |                          |                    |   |                          |             |   |                          |                                                |   |                          |               |   |                          |                                |   |                          |                                                     |   |                          |                                                          |   |                          |       |
| 0  | tools_motor__0                                                                   | Other                                                                                            |                                                                                                                                                                                                                                                                                                                                                                                                                                                                                                                                                                                                                                                                                                                                                                                                                         |   |                          |                    |   |                          |             |   |                          |                                                |   |                          |               |   |                          |                                |   |                          |                                                     |   |                          |                                                          |   |                          |       |
| 29 | motor_subtests_bayley<br>Show the field ONLY if:<br>[tools_motor(4)] = '1'       | For the Bayley, please specify the subtests/screener used.                                       | notes                                                                                                                                                                                                                                                                                                                                                                                                                                                                                                                                                                                                                                                                                                                                                                                                                   |   |                          |                    |   |                          |             |   |                          |                                                |   |                          |               |   |                          |                                |   |                          |                                                     |   |                          |                                                          |   |                          |       |
| 30 | motor_subtests_vmi<br>Show the field ONLY if:<br>[tools_motor(5)] = '1'          | For the VMI, please specify subtests/version used if you are not administering the full battery. | notes                                                                                                                                                                                                                                                                                                                                                                                                                                                                                                                                                                                                                                                                                                                                                                                                                   |   |                          |                    |   |                          |             |   |                          |                                                |   |                          |               |   |                          |                                |   |                          |                                                     |   |                          |                                                          |   |                          |       |
| 31 | motor_subtests_bot<br>Show the field ONLY if:<br>[tools_motor(6)] = '1'          | For the BOT, please specify subtests used if you are not administering the core battery.         | notes                                                                                                                                                                                                                                                                                                                                                                                                                                                                                                                                                                                                                                                                                                                                                                                                                   |   |                          |                    |   |                          |             |   |                          |                                                |   |                          |               |   |                          |                                |   |                          |                                                     |   |                          |                                                          |   |                          |       |
| 32 | tools_motor_other<br>Show the field ONLY if:<br>[tools_motor(0)] = '1'           | If other, please specify, including subtests where appropriate.                                  | notes                                                                                                                                                                                                                                                                                                                                                                                                                                                                                                                                                                                                                                                                                                                                                                                                                   |   |                          |                    |   |                          |             |   |                          |                                                |   |                          |               |   |                          |                                |   |                          |                                                     |   |                          |                                                          |   |                          |       |

|    |                                                                                                |                                                                                    |                                                                                                                                                                                                                                                                                                                                                                                                                                                                                                                                                                                                                                                                                                                                                                                                                                                                                                                                                                                                                                                                                                                                                                                                                                                                                                      |   |                    |                    |   |                    |             |   |                    |                             |   |                    |                                                  |   |                    |                                  |   |                    |                                                     |   |                    |                                                              |   |                    |                                         |   |                    |                                            |    |                     |                                          |    |                     |                                              |    |                     |                                        |   |                    |       |
|----|------------------------------------------------------------------------------------------------|------------------------------------------------------------------------------------|------------------------------------------------------------------------------------------------------------------------------------------------------------------------------------------------------------------------------------------------------------------------------------------------------------------------------------------------------------------------------------------------------------------------------------------------------------------------------------------------------------------------------------------------------------------------------------------------------------------------------------------------------------------------------------------------------------------------------------------------------------------------------------------------------------------------------------------------------------------------------------------------------------------------------------------------------------------------------------------------------------------------------------------------------------------------------------------------------------------------------------------------------------------------------------------------------------------------------------------------------------------------------------------------------|---|--------------------|--------------------|---|--------------------|-------------|---|--------------------|-----------------------------|---|--------------------|--------------------------------------------------|---|--------------------|----------------------------------|---|--------------------|-----------------------------------------------------|---|--------------------|--------------------------------------------------------------|---|--------------------|-----------------------------------------|---|--------------------|--------------------------------------------|----|---------------------|------------------------------------------|----|---------------------|----------------------------------------------|----|---------------------|----------------------------------------|---|--------------------|-------|
| 33 | <p>tools_cognition</p> <p>Show the field ONLY if:<br/>[domains(6)] = '1'</p>                   | <p>Cognition</p> <p>Please select all that apply</p>                               | <p>checkbox, Required</p> <table border="1"> <tr> <td>1</td> <td>tools_cognition__1</td> <td>Clinical Judgement</td> </tr> <tr> <td>2</td> <td>tools_cognition__2</td> <td>Observation</td> </tr> <tr> <td>3</td> <td>tools_cognition__3</td> <td>Previous non-FASD diagnoses</td> </tr> <tr> <td>4</td> <td>tools_cognition__4</td> <td>Wechsler Intelligence Scales for Children (WISC)</td> </tr> <tr> <td>5</td> <td>tools_cognition__5</td> <td>Bayley</td> </tr> <tr> <td>6</td> <td>tools_cognition__6</td> <td>Differential Abilities Scales (DAS)</td> </tr> <tr> <td>7</td> <td>tools_cognition__7</td> <td>Wechsler Preschool and Primary Scale of Intelligence (WPPSI)</td> </tr> <tr> <td>8</td> <td>tools_cognition__8</td> <td>Stanford-Binet Intelligence Scales (SB)</td> </tr> <tr> <td>9</td> <td>tools_cognition__9</td> <td>Wechsler Non-Verbal Scale of Ability (WNV)</td> </tr> <tr> <td>10</td> <td>tools_cognition__10</td> <td>Wechsler Adult Intelligence Scale (WAIS)</td> </tr> <tr> <td>11</td> <td>tools_cognition__11</td> <td>Universal Nonverbal Intelligence Test (UNIT)</td> </tr> <tr> <td>12</td> <td>tools_cognition__12</td> <td>Naglieri Nonverbal Ability Test (NNAT)</td> </tr> <tr> <td>0</td> <td>tools_cognition__0</td> <td>Other</td> </tr> </table> | 1 | tools_cognition__1 | Clinical Judgement | 2 | tools_cognition__2 | Observation | 3 | tools_cognition__3 | Previous non-FASD diagnoses | 4 | tools_cognition__4 | Wechsler Intelligence Scales for Children (WISC) | 5 | tools_cognition__5 | Bayley                           | 6 | tools_cognition__6 | Differential Abilities Scales (DAS)                 | 7 | tools_cognition__7 | Wechsler Preschool and Primary Scale of Intelligence (WPPSI) | 8 | tools_cognition__8 | Stanford-Binet Intelligence Scales (SB) | 9 | tools_cognition__9 | Wechsler Non-Verbal Scale of Ability (WNV) | 10 | tools_cognition__10 | Wechsler Adult Intelligence Scale (WAIS) | 11 | tools_cognition__11 | Universal Nonverbal Intelligence Test (UNIT) | 12 | tools_cognition__12 | Naglieri Nonverbal Ability Test (NNAT) | 0 | tools_cognition__0 | Other |
| 1  | tools_cognition__1                                                                             | Clinical Judgement                                                                 |                                                                                                                                                                                                                                                                                                                                                                                                                                                                                                                                                                                                                                                                                                                                                                                                                                                                                                                                                                                                                                                                                                                                                                                                                                                                                                      |   |                    |                    |   |                    |             |   |                    |                             |   |                    |                                                  |   |                    |                                  |   |                    |                                                     |   |                    |                                                              |   |                    |                                         |   |                    |                                            |    |                     |                                          |    |                     |                                              |    |                     |                                        |   |                    |       |
| 2  | tools_cognition__2                                                                             | Observation                                                                        |                                                                                                                                                                                                                                                                                                                                                                                                                                                                                                                                                                                                                                                                                                                                                                                                                                                                                                                                                                                                                                                                                                                                                                                                                                                                                                      |   |                    |                    |   |                    |             |   |                    |                             |   |                    |                                                  |   |                    |                                  |   |                    |                                                     |   |                    |                                                              |   |                    |                                         |   |                    |                                            |    |                     |                                          |    |                     |                                              |    |                     |                                        |   |                    |       |
| 3  | tools_cognition__3                                                                             | Previous non-FASD diagnoses                                                        |                                                                                                                                                                                                                                                                                                                                                                                                                                                                                                                                                                                                                                                                                                                                                                                                                                                                                                                                                                                                                                                                                                                                                                                                                                                                                                      |   |                    |                    |   |                    |             |   |                    |                             |   |                    |                                                  |   |                    |                                  |   |                    |                                                     |   |                    |                                                              |   |                    |                                         |   |                    |                                            |    |                     |                                          |    |                     |                                              |    |                     |                                        |   |                    |       |
| 4  | tools_cognition__4                                                                             | Wechsler Intelligence Scales for Children (WISC)                                   |                                                                                                                                                                                                                                                                                                                                                                                                                                                                                                                                                                                                                                                                                                                                                                                                                                                                                                                                                                                                                                                                                                                                                                                                                                                                                                      |   |                    |                    |   |                    |             |   |                    |                             |   |                    |                                                  |   |                    |                                  |   |                    |                                                     |   |                    |                                                              |   |                    |                                         |   |                    |                                            |    |                     |                                          |    |                     |                                              |    |                     |                                        |   |                    |       |
| 5  | tools_cognition__5                                                                             | Bayley                                                                             |                                                                                                                                                                                                                                                                                                                                                                                                                                                                                                                                                                                                                                                                                                                                                                                                                                                                                                                                                                                                                                                                                                                                                                                                                                                                                                      |   |                    |                    |   |                    |             |   |                    |                             |   |                    |                                                  |   |                    |                                  |   |                    |                                                     |   |                    |                                                              |   |                    |                                         |   |                    |                                            |    |                     |                                          |    |                     |                                              |    |                     |                                        |   |                    |       |
| 6  | tools_cognition__6                                                                             | Differential Abilities Scales (DAS)                                                |                                                                                                                                                                                                                                                                                                                                                                                                                                                                                                                                                                                                                                                                                                                                                                                                                                                                                                                                                                                                                                                                                                                                                                                                                                                                                                      |   |                    |                    |   |                    |             |   |                    |                             |   |                    |                                                  |   |                    |                                  |   |                    |                                                     |   |                    |                                                              |   |                    |                                         |   |                    |                                            |    |                     |                                          |    |                     |                                              |    |                     |                                        |   |                    |       |
| 7  | tools_cognition__7                                                                             | Wechsler Preschool and Primary Scale of Intelligence (WPPSI)                       |                                                                                                                                                                                                                                                                                                                                                                                                                                                                                                                                                                                                                                                                                                                                                                                                                                                                                                                                                                                                                                                                                                                                                                                                                                                                                                      |   |                    |                    |   |                    |             |   |                    |                             |   |                    |                                                  |   |                    |                                  |   |                    |                                                     |   |                    |                                                              |   |                    |                                         |   |                    |                                            |    |                     |                                          |    |                     |                                              |    |                     |                                        |   |                    |       |
| 8  | tools_cognition__8                                                                             | Stanford-Binet Intelligence Scales (SB)                                            |                                                                                                                                                                                                                                                                                                                                                                                                                                                                                                                                                                                                                                                                                                                                                                                                                                                                                                                                                                                                                                                                                                                                                                                                                                                                                                      |   |                    |                    |   |                    |             |   |                    |                             |   |                    |                                                  |   |                    |                                  |   |                    |                                                     |   |                    |                                                              |   |                    |                                         |   |                    |                                            |    |                     |                                          |    |                     |                                              |    |                     |                                        |   |                    |       |
| 9  | tools_cognition__9                                                                             | Wechsler Non-Verbal Scale of Ability (WNV)                                         |                                                                                                                                                                                                                                                                                                                                                                                                                                                                                                                                                                                                                                                                                                                                                                                                                                                                                                                                                                                                                                                                                                                                                                                                                                                                                                      |   |                    |                    |   |                    |             |   |                    |                             |   |                    |                                                  |   |                    |                                  |   |                    |                                                     |   |                    |                                                              |   |                    |                                         |   |                    |                                            |    |                     |                                          |    |                     |                                              |    |                     |                                        |   |                    |       |
| 10 | tools_cognition__10                                                                            | Wechsler Adult Intelligence Scale (WAIS)                                           |                                                                                                                                                                                                                                                                                                                                                                                                                                                                                                                                                                                                                                                                                                                                                                                                                                                                                                                                                                                                                                                                                                                                                                                                                                                                                                      |   |                    |                    |   |                    |             |   |                    |                             |   |                    |                                                  |   |                    |                                  |   |                    |                                                     |   |                    |                                                              |   |                    |                                         |   |                    |                                            |    |                     |                                          |    |                     |                                              |    |                     |                                        |   |                    |       |
| 11 | tools_cognition__11                                                                            | Universal Nonverbal Intelligence Test (UNIT)                                       |                                                                                                                                                                                                                                                                                                                                                                                                                                                                                                                                                                                                                                                                                                                                                                                                                                                                                                                                                                                                                                                                                                                                                                                                                                                                                                      |   |                    |                    |   |                    |             |   |                    |                             |   |                    |                                                  |   |                    |                                  |   |                    |                                                     |   |                    |                                                              |   |                    |                                         |   |                    |                                            |    |                     |                                          |    |                     |                                              |    |                     |                                        |   |                    |       |
| 12 | tools_cognition__12                                                                            | Naglieri Nonverbal Ability Test (NNAT)                                             |                                                                                                                                                                                                                                                                                                                                                                                                                                                                                                                                                                                                                                                                                                                                                                                                                                                                                                                                                                                                                                                                                                                                                                                                                                                                                                      |   |                    |                    |   |                    |             |   |                    |                             |   |                    |                                                  |   |                    |                                  |   |                    |                                                     |   |                    |                                                              |   |                    |                                         |   |                    |                                            |    |                     |                                          |    |                     |                                              |    |                     |                                        |   |                    |       |
| 0  | tools_cognition__0                                                                             | Other                                                                              |                                                                                                                                                                                                                                                                                                                                                                                                                                                                                                                                                                                                                                                                                                                                                                                                                                                                                                                                                                                                                                                                                                                                                                                                                                                                                                      |   |                    |                    |   |                    |             |   |                    |                             |   |                    |                                                  |   |                    |                                  |   |                    |                                                     |   |                    |                                                              |   |                    |                                         |   |                    |                                            |    |                     |                                          |    |                     |                                              |    |                     |                                        |   |                    |       |
| 34 | <p>cognition_subtests_wisc</p> <p>Show the field ONLY if:<br/>[tools_cognition(4)] = '1'</p>   | For the WISC, please specify subtests used if not administering the core battery.  | notes                                                                                                                                                                                                                                                                                                                                                                                                                                                                                                                                                                                                                                                                                                                                                                                                                                                                                                                                                                                                                                                                                                                                                                                                                                                                                                |   |                    |                    |   |                    |             |   |                    |                             |   |                    |                                                  |   |                    |                                  |   |                    |                                                     |   |                    |                                                              |   |                    |                                         |   |                    |                                            |    |                     |                                          |    |                     |                                              |    |                     |                                        |   |                    |       |
| 35 | <p>cognition_subtests_bayley</p> <p>Show the field ONLY if:<br/>[tools_cognition(5)] = '1'</p> | For the Bayley, please specify the subtests/screener used.                         | notes                                                                                                                                                                                                                                                                                                                                                                                                                                                                                                                                                                                                                                                                                                                                                                                                                                                                                                                                                                                                                                                                                                                                                                                                                                                                                                |   |                    |                    |   |                    |             |   |                    |                             |   |                    |                                                  |   |                    |                                  |   |                    |                                                     |   |                    |                                                              |   |                    |                                         |   |                    |                                            |    |                     |                                          |    |                     |                                              |    |                     |                                        |   |                    |       |
| 36 | <p>cognition_subtests_das</p> <p>Show the field ONLY if:<br/>[tools_cognition(6)] = '1'</p>    | For the DAS, please specify subtests used if not administering the core battery.   | notes                                                                                                                                                                                                                                                                                                                                                                                                                                                                                                                                                                                                                                                                                                                                                                                                                                                                                                                                                                                                                                                                                                                                                                                                                                                                                                |   |                    |                    |   |                    |             |   |                    |                             |   |                    |                                                  |   |                    |                                  |   |                    |                                                     |   |                    |                                                              |   |                    |                                         |   |                    |                                            |    |                     |                                          |    |                     |                                              |    |                     |                                        |   |                    |       |
| 37 | <p>cognition_subtests_wppsi</p> <p>Show the field ONLY if:<br/>[tools_cognition(7)] = '1'</p>  | For the WPPSI, please specify subtests used if not administering the core battery. | notes                                                                                                                                                                                                                                                                                                                                                                                                                                                                                                                                                                                                                                                                                                                                                                                                                                                                                                                                                                                                                                                                                                                                                                                                                                                                                                |   |                    |                    |   |                    |             |   |                    |                             |   |                    |                                                  |   |                    |                                  |   |                    |                                                     |   |                    |                                                              |   |                    |                                         |   |                    |                                            |    |                     |                                          |    |                     |                                              |    |                     |                                        |   |                    |       |
| 38 | <p>cognition_subtests_wnv</p> <p>Show the field ONLY if:<br/>[tools_cognition(9)] = '1'</p>    | For the WNV, please specify subtests used if not administering the full battery.   | notes                                                                                                                                                                                                                                                                                                                                                                                                                                                                                                                                                                                                                                                                                                                                                                                                                                                                                                                                                                                                                                                                                                                                                                                                                                                                                                |   |                    |                    |   |                    |             |   |                    |                             |   |                    |                                                  |   |                    |                                  |   |                    |                                                     |   |                    |                                                              |   |                    |                                         |   |                    |                                            |    |                     |                                          |    |                     |                                              |    |                     |                                        |   |                    |       |
| 39 | <p>cognition_subtests_wais</p> <p>Show the field ONLY if:<br/>[tools_cognition(10)] = '1'</p>  | For the WAIS, please specify subtests used if not administering the core battery.  | notes                                                                                                                                                                                                                                                                                                                                                                                                                                                                                                                                                                                                                                                                                                                                                                                                                                                                                                                                                                                                                                                                                                                                                                                                                                                                                                |   |                    |                    |   |                    |             |   |                    |                             |   |                    |                                                  |   |                    |                                  |   |                    |                                                     |   |                    |                                                              |   |                    |                                         |   |                    |                                            |    |                     |                                          |    |                     |                                              |    |                     |                                        |   |                    |       |
| 40 | <p>cognition_subtests_unit</p> <p>Show the field ONLY if:<br/>[tools_cognition(11)] = '1'</p>  | For the UNIT, please specify subtests used if not administering the core battery.  | notes                                                                                                                                                                                                                                                                                                                                                                                                                                                                                                                                                                                                                                                                                                                                                                                                                                                                                                                                                                                                                                                                                                                                                                                                                                                                                                |   |                    |                    |   |                    |             |   |                    |                             |   |                    |                                                  |   |                    |                                  |   |                    |                                                     |   |                    |                                                              |   |                    |                                         |   |                    |                                            |    |                     |                                          |    |                     |                                              |    |                     |                                        |   |                    |       |
| 41 | <p>tools_cognition_other</p> <p>Show the field ONLY if:<br/>[tools_cognition(0)] = '1'</p>     | If other, please specify, including subtests where appropriate.                    | notes                                                                                                                                                                                                                                                                                                                                                                                                                                                                                                                                                                                                                                                                                                                                                                                                                                                                                                                                                                                                                                                                                                                                                                                                                                                                                                |   |                    |                    |   |                    |             |   |                    |                             |   |                    |                                                  |   |                    |                                  |   |                    |                                                     |   |                    |                                                              |   |                    |                                         |   |                    |                                            |    |                     |                                          |    |                     |                                              |    |                     |                                        |   |                    |       |
| 42 | <p>tools_language</p> <p>Show the field ONLY if:<br/>[domains(7)] = '1'</p>                    | <p>Language</p> <p>Please select all that apply</p>                                | <p>checkbox, Required</p> <table border="1"> <tr> <td>1</td> <td>tools_language__1</td> <td>Clinical Judgement</td> </tr> <tr> <td>2</td> <td>tools_language__2</td> <td>Observation</td> </tr> <tr> <td>3</td> <td>tools_language__3</td> <td>Previous non-FASD diagnoses</td> </tr> <tr> <td>4</td> <td>tools_language__4</td> <td>Bayley</td> </tr> <tr> <td>5</td> <td>tools_language__5</td> <td>Pre-School Language Scales (PLS)</td> </tr> <tr> <td>6</td> <td>tools_language__6</td> <td>Clinical Evaluation of Language Fundamentals (CELF)</td> </tr> <tr> <td>0</td> <td>tools_language__0</td> <td>Other</td> </tr> </table>                                                                                                                                                                                                                                                                                                                                                                                                                                                                                                                                                                                                                                                             | 1 | tools_language__1  | Clinical Judgement | 2 | tools_language__2  | Observation | 3 | tools_language__3  | Previous non-FASD diagnoses | 4 | tools_language__4  | Bayley                                           | 5 | tools_language__5  | Pre-School Language Scales (PLS) | 6 | tools_language__6  | Clinical Evaluation of Language Fundamentals (CELF) | 0 | tools_language__0  | Other                                                        |   |                    |                                         |   |                    |                                            |    |                     |                                          |    |                     |                                              |    |                     |                                        |   |                    |       |
| 1  | tools_language__1                                                                              | Clinical Judgement                                                                 |                                                                                                                                                                                                                                                                                                                                                                                                                                                                                                                                                                                                                                                                                                                                                                                                                                                                                                                                                                                                                                                                                                                                                                                                                                                                                                      |   |                    |                    |   |                    |             |   |                    |                             |   |                    |                                                  |   |                    |                                  |   |                    |                                                     |   |                    |                                                              |   |                    |                                         |   |                    |                                            |    |                     |                                          |    |                     |                                              |    |                     |                                        |   |                    |       |
| 2  | tools_language__2                                                                              | Observation                                                                        |                                                                                                                                                                                                                                                                                                                                                                                                                                                                                                                                                                                                                                                                                                                                                                                                                                                                                                                                                                                                                                                                                                                                                                                                                                                                                                      |   |                    |                    |   |                    |             |   |                    |                             |   |                    |                                                  |   |                    |                                  |   |                    |                                                     |   |                    |                                                              |   |                    |                                         |   |                    |                                            |    |                     |                                          |    |                     |                                              |    |                     |                                        |   |                    |       |
| 3  | tools_language__3                                                                              | Previous non-FASD diagnoses                                                        |                                                                                                                                                                                                                                                                                                                                                                                                                                                                                                                                                                                                                                                                                                                                                                                                                                                                                                                                                                                                                                                                                                                                                                                                                                                                                                      |   |                    |                    |   |                    |             |   |                    |                             |   |                    |                                                  |   |                    |                                  |   |                    |                                                     |   |                    |                                                              |   |                    |                                         |   |                    |                                            |    |                     |                                          |    |                     |                                              |    |                     |                                        |   |                    |       |
| 4  | tools_language__4                                                                              | Bayley                                                                             |                                                                                                                                                                                                                                                                                                                                                                                                                                                                                                                                                                                                                                                                                                                                                                                                                                                                                                                                                                                                                                                                                                                                                                                                                                                                                                      |   |                    |                    |   |                    |             |   |                    |                             |   |                    |                                                  |   |                    |                                  |   |                    |                                                     |   |                    |                                                              |   |                    |                                         |   |                    |                                            |    |                     |                                          |    |                     |                                              |    |                     |                                        |   |                    |       |
| 5  | tools_language__5                                                                              | Pre-School Language Scales (PLS)                                                   |                                                                                                                                                                                                                                                                                                                                                                                                                                                                                                                                                                                                                                                                                                                                                                                                                                                                                                                                                                                                                                                                                                                                                                                                                                                                                                      |   |                    |                    |   |                    |             |   |                    |                             |   |                    |                                                  |   |                    |                                  |   |                    |                                                     |   |                    |                                                              |   |                    |                                         |   |                    |                                            |    |                     |                                          |    |                     |                                              |    |                     |                                        |   |                    |       |
| 6  | tools_language__6                                                                              | Clinical Evaluation of Language Fundamentals (CELF)                                |                                                                                                                                                                                                                                                                                                                                                                                                                                                                                                                                                                                                                                                                                                                                                                                                                                                                                                                                                                                                                                                                                                                                                                                                                                                                                                      |   |                    |                    |   |                    |             |   |                    |                             |   |                    |                                                  |   |                    |                                  |   |                    |                                                     |   |                    |                                                              |   |                    |                                         |   |                    |                                            |    |                     |                                          |    |                     |                                              |    |                     |                                        |   |                    |       |
| 0  | tools_language__0                                                                              | Other                                                                              |                                                                                                                                                                                                                                                                                                                                                                                                                                                                                                                                                                                                                                                                                                                                                                                                                                                                                                                                                                                                                                                                                                                                                                                                                                                                                                      |   |                    |                    |   |                    |             |   |                    |                             |   |                    |                                                  |   |                    |                                  |   |                    |                                                     |   |                    |                                                              |   |                    |                                         |   |                    |                                            |    |                     |                                          |    |                     |                                              |    |                     |                                        |   |                    |       |

|    |                                                                                   |                                                                                                            |                                                                                                                                                                                                                                                                                                                                                                                                                                                                                                                                                                                                                                                                                                                                                                                                                                                                                                                                                                                                                                                                                                                                                                                                                                          |   |                   |                    |   |                   |             |   |                   |                             |   |                   |                           |   |                   |                                                       |   |                   |                                            |   |                   |                                        |   |                   |                                             |   |                   |                                    |    |                    |                                                |    |                    |                                            |    |                    |                                        |   |                   |       |
|----|-----------------------------------------------------------------------------------|------------------------------------------------------------------------------------------------------------|------------------------------------------------------------------------------------------------------------------------------------------------------------------------------------------------------------------------------------------------------------------------------------------------------------------------------------------------------------------------------------------------------------------------------------------------------------------------------------------------------------------------------------------------------------------------------------------------------------------------------------------------------------------------------------------------------------------------------------------------------------------------------------------------------------------------------------------------------------------------------------------------------------------------------------------------------------------------------------------------------------------------------------------------------------------------------------------------------------------------------------------------------------------------------------------------------------------------------------------|---|-------------------|--------------------|---|-------------------|-------------|---|-------------------|-----------------------------|---|-------------------|---------------------------|---|-------------------|-------------------------------------------------------|---|-------------------|--------------------------------------------|---|-------------------|----------------------------------------|---|-------------------|---------------------------------------------|---|-------------------|------------------------------------|----|--------------------|------------------------------------------------|----|--------------------|--------------------------------------------|----|--------------------|----------------------------------------|---|-------------------|-------|
| 43 | language_subtests_bayley<br>Show the field ONLY if:<br>[tools_language(4)] = '1'  | For the Bayley, please specify the subtests/screener used.                                                 | notes                                                                                                                                                                                                                                                                                                                                                                                                                                                                                                                                                                                                                                                                                                                                                                                                                                                                                                                                                                                                                                                                                                                                                                                                                                    |   |                   |                    |   |                   |             |   |                   |                             |   |                   |                           |   |                   |                                                       |   |                   |                                            |   |                   |                                        |   |                   |                                             |   |                   |                                    |    |                    |                                                |    |                    |                                            |    |                    |                                        |   |                   |       |
| 44 | language_subtests_pls<br>Show the field ONLY if:<br>[tools_language(5)] = '1'     | For the PLS, please specify the scales/supplementary measures used if not administering the core battery.  | notes                                                                                                                                                                                                                                                                                                                                                                                                                                                                                                                                                                                                                                                                                                                                                                                                                                                                                                                                                                                                                                                                                                                                                                                                                                    |   |                   |                    |   |                   |             |   |                   |                             |   |                   |                           |   |                   |                                                       |   |                   |                                            |   |                   |                                        |   |                   |                                             |   |                   |                                    |    |                    |                                                |    |                    |                                            |    |                    |                                        |   |                   |       |
| 45 | language_subtests_celf<br>Show the field ONLY if:<br>[tools_language(6)] = '1'    | For the CELF, please specify the subtests/screener used if not administering the core battery.             | notes                                                                                                                                                                                                                                                                                                                                                                                                                                                                                                                                                                                                                                                                                                                                                                                                                                                                                                                                                                                                                                                                                                                                                                                                                                    |   |                   |                    |   |                   |             |   |                   |                             |   |                   |                           |   |                   |                                                       |   |                   |                                            |   |                   |                                        |   |                   |                                             |   |                   |                                    |    |                    |                                                |    |                    |                                            |    |                    |                                        |   |                   |       |
| 46 | tools_language_other<br>Show the field ONLY if:<br>[tools_language(0)] = '1'      | If other, please specify, including subtests where appropriate.                                            | notes                                                                                                                                                                                                                                                                                                                                                                                                                                                                                                                                                                                                                                                                                                                                                                                                                                                                                                                                                                                                                                                                                                                                                                                                                                    |   |                   |                    |   |                   |             |   |                   |                             |   |                   |                           |   |                   |                                                       |   |                   |                                            |   |                   |                                        |   |                   |                                             |   |                   |                                    |    |                    |                                                |    |                    |                                            |    |                    |                                        |   |                   |       |
| 47 | tools_academic<br>Show the field ONLY if:<br>[domains(8)] = '1'                   | Academic Achievement<br><br>Please select all that apply                                                   | checkbox, Required<br><table border="1"> <tr><td>1</td><td>tools_academic__1</td><td>Clinical Judgement</td></tr> <tr><td>2</td><td>tools_academic__2</td><td>Observation</td></tr> <tr><td>3</td><td>tools_academic__3</td><td>Previous non-FASD diagnoses</td></tr> <tr><td>4</td><td>tools_academic__4</td><td>Teacher Rating Form (TRF)</td></tr> <tr><td>5</td><td>tools_academic__5</td><td>School-based Standardised Literacy and Numeracy tests</td></tr> <tr><td>6</td><td>tools_academic__6</td><td>Bracken School Readiness Assessment (BSRA)</td></tr> <tr><td>7</td><td>tools_academic__7</td><td>Woodcock-Johnson Achievement Test (WJ)</td></tr> <tr><td>8</td><td>tools_academic__8</td><td>Wechsler Individual Achievement Test (WIAT)</td></tr> <tr><td>9</td><td>tools_academic__9</td><td>Wide Range Achievement Test (WRAT)</td></tr> <tr><td>10</td><td>tools_academic__10</td><td>Kaufman Test of Educational Achievement (KTEA)</td></tr> <tr><td>11</td><td>tools_academic__11</td><td>Peabody Individual Achievement Test (PIAT)</td></tr> <tr><td>12</td><td>tools_academic__12</td><td>School reports with achievement levels</td></tr> <tr><td>0</td><td>tools_academic__0</td><td>Other</td></tr> </table> | 1 | tools_academic__1 | Clinical Judgement | 2 | tools_academic__2 | Observation | 3 | tools_academic__3 | Previous non-FASD diagnoses | 4 | tools_academic__4 | Teacher Rating Form (TRF) | 5 | tools_academic__5 | School-based Standardised Literacy and Numeracy tests | 6 | tools_academic__6 | Bracken School Readiness Assessment (BSRA) | 7 | tools_academic__7 | Woodcock-Johnson Achievement Test (WJ) | 8 | tools_academic__8 | Wechsler Individual Achievement Test (WIAT) | 9 | tools_academic__9 | Wide Range Achievement Test (WRAT) | 10 | tools_academic__10 | Kaufman Test of Educational Achievement (KTEA) | 11 | tools_academic__11 | Peabody Individual Achievement Test (PIAT) | 12 | tools_academic__12 | School reports with achievement levels | 0 | tools_academic__0 | Other |
| 1  | tools_academic__1                                                                 | Clinical Judgement                                                                                         |                                                                                                                                                                                                                                                                                                                                                                                                                                                                                                                                                                                                                                                                                                                                                                                                                                                                                                                                                                                                                                                                                                                                                                                                                                          |   |                   |                    |   |                   |             |   |                   |                             |   |                   |                           |   |                   |                                                       |   |                   |                                            |   |                   |                                        |   |                   |                                             |   |                   |                                    |    |                    |                                                |    |                    |                                            |    |                    |                                        |   |                   |       |
| 2  | tools_academic__2                                                                 | Observation                                                                                                |                                                                                                                                                                                                                                                                                                                                                                                                                                                                                                                                                                                                                                                                                                                                                                                                                                                                                                                                                                                                                                                                                                                                                                                                                                          |   |                   |                    |   |                   |             |   |                   |                             |   |                   |                           |   |                   |                                                       |   |                   |                                            |   |                   |                                        |   |                   |                                             |   |                   |                                    |    |                    |                                                |    |                    |                                            |    |                    |                                        |   |                   |       |
| 3  | tools_academic__3                                                                 | Previous non-FASD diagnoses                                                                                |                                                                                                                                                                                                                                                                                                                                                                                                                                                                                                                                                                                                                                                                                                                                                                                                                                                                                                                                                                                                                                                                                                                                                                                                                                          |   |                   |                    |   |                   |             |   |                   |                             |   |                   |                           |   |                   |                                                       |   |                   |                                            |   |                   |                                        |   |                   |                                             |   |                   |                                    |    |                    |                                                |    |                    |                                            |    |                    |                                        |   |                   |       |
| 4  | tools_academic__4                                                                 | Teacher Rating Form (TRF)                                                                                  |                                                                                                                                                                                                                                                                                                                                                                                                                                                                                                                                                                                                                                                                                                                                                                                                                                                                                                                                                                                                                                                                                                                                                                                                                                          |   |                   |                    |   |                   |             |   |                   |                             |   |                   |                           |   |                   |                                                       |   |                   |                                            |   |                   |                                        |   |                   |                                             |   |                   |                                    |    |                    |                                                |    |                    |                                            |    |                    |                                        |   |                   |       |
| 5  | tools_academic__5                                                                 | School-based Standardised Literacy and Numeracy tests                                                      |                                                                                                                                                                                                                                                                                                                                                                                                                                                                                                                                                                                                                                                                                                                                                                                                                                                                                                                                                                                                                                                                                                                                                                                                                                          |   |                   |                    |   |                   |             |   |                   |                             |   |                   |                           |   |                   |                                                       |   |                   |                                            |   |                   |                                        |   |                   |                                             |   |                   |                                    |    |                    |                                                |    |                    |                                            |    |                    |                                        |   |                   |       |
| 6  | tools_academic__6                                                                 | Bracken School Readiness Assessment (BSRA)                                                                 |                                                                                                                                                                                                                                                                                                                                                                                                                                                                                                                                                                                                                                                                                                                                                                                                                                                                                                                                                                                                                                                                                                                                                                                                                                          |   |                   |                    |   |                   |             |   |                   |                             |   |                   |                           |   |                   |                                                       |   |                   |                                            |   |                   |                                        |   |                   |                                             |   |                   |                                    |    |                    |                                                |    |                    |                                            |    |                    |                                        |   |                   |       |
| 7  | tools_academic__7                                                                 | Woodcock-Johnson Achievement Test (WJ)                                                                     |                                                                                                                                                                                                                                                                                                                                                                                                                                                                                                                                                                                                                                                                                                                                                                                                                                                                                                                                                                                                                                                                                                                                                                                                                                          |   |                   |                    |   |                   |             |   |                   |                             |   |                   |                           |   |                   |                                                       |   |                   |                                            |   |                   |                                        |   |                   |                                             |   |                   |                                    |    |                    |                                                |    |                    |                                            |    |                    |                                        |   |                   |       |
| 8  | tools_academic__8                                                                 | Wechsler Individual Achievement Test (WIAT)                                                                |                                                                                                                                                                                                                                                                                                                                                                                                                                                                                                                                                                                                                                                                                                                                                                                                                                                                                                                                                                                                                                                                                                                                                                                                                                          |   |                   |                    |   |                   |             |   |                   |                             |   |                   |                           |   |                   |                                                       |   |                   |                                            |   |                   |                                        |   |                   |                                             |   |                   |                                    |    |                    |                                                |    |                    |                                            |    |                    |                                        |   |                   |       |
| 9  | tools_academic__9                                                                 | Wide Range Achievement Test (WRAT)                                                                         |                                                                                                                                                                                                                                                                                                                                                                                                                                                                                                                                                                                                                                                                                                                                                                                                                                                                                                                                                                                                                                                                                                                                                                                                                                          |   |                   |                    |   |                   |             |   |                   |                             |   |                   |                           |   |                   |                                                       |   |                   |                                            |   |                   |                                        |   |                   |                                             |   |                   |                                    |    |                    |                                                |    |                    |                                            |    |                    |                                        |   |                   |       |
| 10 | tools_academic__10                                                                | Kaufman Test of Educational Achievement (KTEA)                                                             |                                                                                                                                                                                                                                                                                                                                                                                                                                                                                                                                                                                                                                                                                                                                                                                                                                                                                                                                                                                                                                                                                                                                                                                                                                          |   |                   |                    |   |                   |             |   |                   |                             |   |                   |                           |   |                   |                                                       |   |                   |                                            |   |                   |                                        |   |                   |                                             |   |                   |                                    |    |                    |                                                |    |                    |                                            |    |                    |                                        |   |                   |       |
| 11 | tools_academic__11                                                                | Peabody Individual Achievement Test (PIAT)                                                                 |                                                                                                                                                                                                                                                                                                                                                                                                                                                                                                                                                                                                                                                                                                                                                                                                                                                                                                                                                                                                                                                                                                                                                                                                                                          |   |                   |                    |   |                   |             |   |                   |                             |   |                   |                           |   |                   |                                                       |   |                   |                                            |   |                   |                                        |   |                   |                                             |   |                   |                                    |    |                    |                                                |    |                    |                                            |    |                    |                                        |   |                   |       |
| 12 | tools_academic__12                                                                | School reports with achievement levels                                                                     |                                                                                                                                                                                                                                                                                                                                                                                                                                                                                                                                                                                                                                                                                                                                                                                                                                                                                                                                                                                                                                                                                                                                                                                                                                          |   |                   |                    |   |                   |             |   |                   |                             |   |                   |                           |   |                   |                                                       |   |                   |                                            |   |                   |                                        |   |                   |                                             |   |                   |                                    |    |                    |                                                |    |                    |                                            |    |                    |                                        |   |                   |       |
| 0  | tools_academic__0                                                                 | Other                                                                                                      |                                                                                                                                                                                                                                                                                                                                                                                                                                                                                                                                                                                                                                                                                                                                                                                                                                                                                                                                                                                                                                                                                                                                                                                                                                          |   |                   |                    |   |                   |             |   |                   |                             |   |                   |                           |   |                   |                                                       |   |                   |                                            |   |                   |                                        |   |                   |                                             |   |                   |                                    |    |                    |                                                |    |                    |                                            |    |                    |                                        |   |                   |       |
| 48 | academic_subtests_brsta<br>Show the field ONLY if:<br>[tools_academic(6)] = '1'   | For the BRSA, please specify the subtests used if not administering the full battery.                      | notes                                                                                                                                                                                                                                                                                                                                                                                                                                                                                                                                                                                                                                                                                                                                                                                                                                                                                                                                                                                                                                                                                                                                                                                                                                    |   |                   |                    |   |                   |             |   |                   |                             |   |                   |                           |   |                   |                                                       |   |                   |                                            |   |                   |                                        |   |                   |                                             |   |                   |                                    |    |                    |                                                |    |                    |                                            |    |                    |                                        |   |                   |       |
| 49 | academic_subtests_wj<br>Show the field ONLY if:<br>[tools_academic(7)] = '1'      | For the WJ, please specify the battery used as well as the subtests if not administering the full battery. | notes                                                                                                                                                                                                                                                                                                                                                                                                                                                                                                                                                                                                                                                                                                                                                                                                                                                                                                                                                                                                                                                                                                                                                                                                                                    |   |                   |                    |   |                   |             |   |                   |                             |   |                   |                           |   |                   |                                                       |   |                   |                                            |   |                   |                                        |   |                   |                                             |   |                   |                                    |    |                    |                                                |    |                    |                                            |    |                    |                                        |   |                   |       |
| 50 | academic_subtests_wiat<br>Show the field ONLY if:<br>[tools_academic(8)] = '1'    | For the WIAT, please specify the subtests used if not administering the core battery.                      | notes                                                                                                                                                                                                                                                                                                                                                                                                                                                                                                                                                                                                                                                                                                                                                                                                                                                                                                                                                                                                                                                                                                                                                                                                                                    |   |                   |                    |   |                   |             |   |                   |                             |   |                   |                           |   |                   |                                                       |   |                   |                                            |   |                   |                                        |   |                   |                                             |   |                   |                                    |    |                    |                                                |    |                    |                                            |    |                    |                                        |   |                   |       |
| 51 | academic_subtests_wrat<br>Show the field ONLY if:<br>[tools_academic(9)] = '1'    | For the WRAT, please specify the subtests used if not administering the full battery.                      | notes                                                                                                                                                                                                                                                                                                                                                                                                                                                                                                                                                                                                                                                                                                                                                                                                                                                                                                                                                                                                                                                                                                                                                                                                                                    |   |                   |                    |   |                   |             |   |                   |                             |   |                   |                           |   |                   |                                                       |   |                   |                                            |   |                   |                                        |   |                   |                                             |   |                   |                                    |    |                    |                                                |    |                    |                                            |    |                    |                                        |   |                   |       |
| 52 | academic_subtests_wiat_2<br>Show the field ONLY if:<br>[tools_academic(10)] = '1' | For the KTEA please specify the subtests used if not administering the core battery.                       | notes                                                                                                                                                                                                                                                                                                                                                                                                                                                                                                                                                                                                                                                                                                                                                                                                                                                                                                                                                                                                                                                                                                                                                                                                                                    |   |                   |                    |   |                   |             |   |                   |                             |   |                   |                           |   |                   |                                                       |   |                   |                                            |   |                   |                                        |   |                   |                                             |   |                   |                                    |    |                    |                                                |    |                    |                                            |    |                    |                                        |   |                   |       |
| 53 | academic_subtests_piat<br>Show the field ONLY if:<br>[tools_academic(11)] = '1'   | For the PIAT, please specify the subtests used if not administering the full battery.                      | notes                                                                                                                                                                                                                                                                                                                                                                                                                                                                                                                                                                                                                                                                                                                                                                                                                                                                                                                                                                                                                                                                                                                                                                                                                                    |   |                   |                    |   |                   |             |   |                   |                             |   |                   |                           |   |                   |                                                       |   |                   |                                            |   |                   |                                        |   |                   |                                             |   |                   |                                    |    |                    |                                                |    |                    |                                            |    |                    |                                        |   |                   |       |
| 54 | tools_academic_other<br>Show the field ONLY if:<br>[tools_academic(0)] = '1'      | If other, please specify, including subtests where appropriate.                                            | notes                                                                                                                                                                                                                                                                                                                                                                                                                                                                                                                                                                                                                                                                                                                                                                                                                                                                                                                                                                                                                                                                                                                                                                                                                                    |   |                   |                    |   |                   |             |   |                   |                             |   |                   |                           |   |                   |                                                       |   |                   |                                            |   |                   |                                        |   |                   |                                             |   |                   |                                    |    |                    |                                                |    |                    |                                            |    |                    |                                        |   |                   |       |

|    |                                                                              |                                                                                             |                    |                  |                                                          |
|----|------------------------------------------------------------------------------|---------------------------------------------------------------------------------------------|--------------------|------------------|----------------------------------------------------------|
| 55 | tools_memory<br>Show the field ONLY if:<br>[domains(9)] = '1'                | Memory<br>Please select all that apply                                                      | checkbox, Required |                  |                                                          |
|    |                                                                              |                                                                                             | 1                  | tools_memory__1  | Clinical Judgement                                       |
|    |                                                                              |                                                                                             | 2                  | tools_memory__2  | Observation                                              |
|    |                                                                              |                                                                                             | 3                  | tools_memory__3  | Previous non-FASD diagnoses                              |
|    |                                                                              |                                                                                             | 4                  | tools_memory__4  | Differential Abilities Scales (DAS)                      |
|    |                                                                              |                                                                                             | 5                  | tools_memory__5  | Behaviour Rating Inventory of Executive Function (BRIEF) |
|    |                                                                              |                                                                                             | 6                  | tools_memory__6  | Developmental Neuropsychological Assessment (NEPSY)      |
|    |                                                                              |                                                                                             | 7                  | tools_memory__7  | Test of Problem Solving - Elementary (TOPS-E)            |
|    |                                                                              |                                                                                             | 11                 | tools_memory__11 | Test of Problem Solving - Adolescent (TOPS-A)            |
|    |                                                                              |                                                                                             | 8                  | tools_memory__8  | Wide Range Assessment of Memory and Learning (WRAML)     |
|    |                                                                              |                                                                                             | 9                  | tools_memory__9  | Wechsler Memory Scale (WMS)                              |
|    |                                                                              |                                                                                             | 10                 | tools_memory__10 | Children's Memory Scale (CMS)                            |
|    |                                                                              |                                                                                             | 0                  | tools_memory__0  | Other                                                    |
| 56 | memory_subtests_das<br>Show the field ONLY if:<br>[tools_memory(4)] = '1'    | For the DAS, please specify subtests used if not administering the core battery.            | notes              |                  |                                                          |
| 57 | memory_subtests_nepsy<br>Show the field ONLY if:<br>[tools_memory(6)] = '1'  | For the NEPSY, please specify subtests used if not administering the core battery.          | notes              |                  |                                                          |
| 58 | memory_subtests_topse<br>Show the field ONLY if:<br>[tools_memory(7)] = '1'  | For the TOPS-E, please specify subtests used if not administering the core battery.         | notes              |                  |                                                          |
| 59 | memory_subtests_topsa<br>Show the field ONLY if:<br>[tools_memory(11)] = '1' | For the TOPS-A, please specify subtests used if not administering the core battery.         | notes              |                  |                                                          |
| 60 | memory_subtests_wraml<br>Show the field ONLY if:<br>[tools_memory(8)] = '1'  | For the WRAML, please specify screener/subtests used if not administering the core battery. | notes              |                  |                                                          |
| 61 | memory_subtests_wms<br>Show the field ONLY if:<br>[tools_memory(9)] = '1'    | For the WMS, please specify subtests used if not administering the core battery.            | notes              |                  |                                                          |
| 62 | memory_subtests_wms_2<br>Show the field ONLY if:<br>[tools_memory(10)] = '1' | For the CMS, please specify subtests used if not administering the core battery.            | notes              |                  |                                                          |
| 63 | tools_memory_other<br>Show the field ONLY if:<br>[tools_memory(0)] = '1'     | If other, please specify, including subtests where appropriate.                             | notes              |                  |                                                          |

|    |                                                                                   |                                                                                     |                    |                                                                        |
|----|-----------------------------------------------------------------------------------|-------------------------------------------------------------------------------------|--------------------|------------------------------------------------------------------------|
| 64 | tools_attention<br>Show the field ONLY if:<br>[domains(10)] = '1'                 | Attention<br>Please select all that apply                                           | checkbox, Required |                                                                        |
|    |                                                                                   |                                                                                     | 1                  | tools_attention__1 Clinical Judgement                                  |
|    |                                                                                   |                                                                                     | 2                  | tools_attention__2 Observation                                         |
|    |                                                                                   |                                                                                     | 3                  | tools_attention__3 Previous non-FASD diagnoses                         |
|    |                                                                                   |                                                                                     | 4                  | tools_attention__4 Child Behaviour Checklist (CBCL)                    |
|    |                                                                                   |                                                                                     | 5                  | tools_attention__5 Teacher Report Form (TRF)                           |
|    |                                                                                   |                                                                                     | 6                  | tools_attention__6 Test of Everyday Attention for Children (Tea-CH)    |
|    |                                                                                   |                                                                                     | 15                 | tools_attention__15 Test of Everyday Attention (TEA)                   |
|    |                                                                                   |                                                                                     | 7                  | tools_attention__7 Developmental Neuropsychological Assessment (NEPSY) |
|    |                                                                                   |                                                                                     | 8                  | tools_attention__8 Conner's Continuous Performance Test                |
|    |                                                                                   |                                                                                     | 9                  | tools_attention__9 Delis-Kaplan Executive Function System (DKEFS)      |
|    |                                                                                   |                                                                                     | 10                 | tools_attention__10 Children's Colour Trails Test                      |
|    |                                                                                   |                                                                                     | 11                 | tools_attention__11 Adult Colour Trails Test                           |
|    |                                                                                   |                                                                                     | 12                 | tools_attention__12 Conners                                            |
|    |                                                                                   |                                                                                     | 13                 | tools_attention__13 Conners Adult ADHD Rating Scales (CAARS)           |
|    |                                                                                   |                                                                                     | 14                 | tools_attention__14 Conners Comprehensive Behaviour Rating Scales      |
|    |                                                                                   |                                                                                     | 0                  | tools_attention__0 Other                                               |
| 65 | attention_subtests_teach<br>Show the field ONLY if:<br>[tools_attention(6)] = '1' | For the TEA-CH, please specify subtests used if not administering the core battery. | notes              |                                                                        |
| 66 | attention_subtests_tea<br>Show the field ONLY if:<br>[tools_attention(15)] = '1'  | For the TEA, please specify subtests used if not administering the core battery.    | notes              |                                                                        |
| 67 | attention_subtests_nepsy<br>Show the field ONLY if:<br>[tools_attention(7)] = '1' | For the NEPSY, please specify subtests used if not administering the core battery.  | notes              |                                                                        |
| 68 | attention_subtests_dkefs<br>Show the field ONLY if:<br>[tools_attention(9)] = '1' | For the DKEFS, please specify subtests used if not administering the core battery.  | notes              |                                                                        |
| 69 | tools_attention_other<br>Show the field ONLY if:<br>[tools_attention(0)] = '1'    | If other, please specify, including subtests where appropriate.                     | notes              |                                                                        |



|    |                                                                                                 |                                                                                                                  |                    |                             |                                                          |
|----|-------------------------------------------------------------------------------------------------|------------------------------------------------------------------------------------------------------------------|--------------------|-----------------------------|----------------------------------------------------------|
| 70 | tools_executivefunction<br><br>Show the field ONLY if:<br>[domains(11)] = '1'                   | Executive Function, including Impulse Control and Hyperactivity<br><br>Please select all that apply              | checkbox, Required |                             |                                                          |
|    |                                                                                                 |                                                                                                                  | 1                  | tools_executivefunction__1  | Clinical Judgement                                       |
|    |                                                                                                 |                                                                                                                  | 2                  | tools_executivefunction__2  | Observation                                              |
|    |                                                                                                 |                                                                                                                  | 3                  | tools_executivefunction__3  | Previous non-FASD diagnoses                              |
|    |                                                                                                 |                                                                                                                  | 4                  | tools_executivefunction__4  | Bayley                                                   |
|    |                                                                                                 |                                                                                                                  | 5                  | tools_executivefunction__5  | Executive Functions Touch                                |
|    |                                                                                                 |                                                                                                                  | 6                  | tools_executivefunction__6  | Behaviour Rating Inventory of Executive Function (BRIEF) |
|    |                                                                                                 |                                                                                                                  | 7                  | tools_executivefunction__7  | Child Behaviour Checklist (CBCL)                         |
|    |                                                                                                 |                                                                                                                  | 8                  | tools_executivefunction__8  | Teacher Report Form (TRF)                                |
|    |                                                                                                 |                                                                                                                  | 9                  | tools_executivefunction__9  | Cogstate                                                 |
|    |                                                                                                 |                                                                                                                  | 10                 | tools_executivefunction__10 | Developmental Neuropsychological Assessment (NEPSY)      |
|    |                                                                                                 |                                                                                                                  | 11                 | tools_executivefunction__11 | Delis-Kaplan Executive Function System (DKEFS)           |
|    |                                                                                                 |                                                                                                                  | 12                 | tools_executivefunction__12 | Rey-Osterrieth Complex Figure (ROCF)                     |
|    |                                                                                                 |                                                                                                                  | 13                 | tools_executivefunction__13 | Comprehensive Executive Function Inventory (CEFI)        |
|    |                                                                                                 |                                                                                                                  | 14                 | tools_executivefunction__14 | Frontal Systems Behaviour Scale (FrsBe)                  |
|    |                                                                                                 |                                                                                                                  | 15                 | tools_executivefunction__15 | Behavior Assessment System for Children (BASC)           |
|    |                                                                                                 |                                                                                                                  | 0                  | tools_executivefunction__0  | Other                                                    |
| 71 | ef_subtests_bayley<br><br>Show the field ONLY if:<br>[tools_executivefunction(4)] = '1'         | For the Bayley, please specify the subtests/screener used.                                                       | notes              |                             |                                                          |
| 72 | attention_subtests_eftouch<br><br>Show the field ONLY if:<br>[tools_executivefunction(5)] = '1' | For the EF Touch, please specify subtests used if not administering the full battery.                            | notes              |                             |                                                          |
| 73 | attention_subtests_cogs<br><br>Show the field ONLY if:<br>[tools_executivefunction(9)] = '1'    | For the Cogstate, please specify the battery used as well as the subtests if not administering the full battery. | notes              |                             |                                                          |
| 74 | ef_subtests_nepsy<br><br>Show the field ONLY if:<br>[tools_executivefunction(10)] = '1'         | For the NEPSY, please specify subtests used if not administering the core battery.                               | notes              |                             |                                                          |
| 75 | ef_subtests_dkefs<br><br>Show the field ONLY if:<br>[tools_executivefunction(11)] = '1'         | For the DKEFS, please specify subtests used if not administering the core battery.                               | notes              |                             |                                                          |
| 76 | ef_subtests_basc<br><br>Show the field ONLY if:<br>[tools_executivefunction(15)] = '1'          | For the BASC, please specify scales/forms used.                                                                  | notes              |                             |                                                          |

|    |                                                                                 |                                                                 |                    |                                                                    |
|----|---------------------------------------------------------------------------------|-----------------------------------------------------------------|--------------------|--------------------------------------------------------------------|
| 77 | tools_ef_other<br>Show the field ONLY if:<br>[tools_executivefunction(0)] = '1' | If other, please specify, including subtests where appropriate. | notes              |                                                                    |
| 78 | tools_affect<br>Show the field ONLY if:<br>[domains(12)] = '1'                  | Affect Regulation<br><br>Please select all that apply           | checkbox, Required |                                                                    |
|    |                                                                                 |                                                                 | 1                  | tools_affect__1 Clinical Judgement                                 |
|    |                                                                                 |                                                                 | 2                  | tools_affect__2 Observation                                        |
|    |                                                                                 |                                                                 | 3                  | tools_affect__3 Previous non-FASD diagnoses                        |
|    |                                                                                 |                                                                 | 4                  | tools_affect__4 Spence Children's Anxiety Scales (SCAS)            |
|    |                                                                                 |                                                                 | 5                  | tools_affect__5 Behaviour Assessment System for Children (BASC)    |
|    |                                                                                 |                                                                 | 6                  | tools_affect__6 Beck Youth Inventories                             |
|    |                                                                                 |                                                                 | 7                  | tools_affect__7 Children's Depression Inventory (CDI)              |
|    |                                                                                 |                                                                 | 8                  | tools_affect__8 Multidimensional Anxiety Scale for Children (MASC) |
|    |                                                                                 |                                                                 | 9                  | tools_affect__9 Child Behaviour Checklist (CBCL)                   |
|    |                                                                                 |                                                                 | 10                 | tools_affect__10 Conners Comprehensive Behaviour Rating Scales     |
|    |                                                                                 |                                                                 | 0                  | tools_affect__0 Other                                              |
| 79 | tools_affect_other<br>Show the field ONLY if:<br>[tools_affect(0)] = '1'        | If other, please specify, including subtests where appropriate. | notes              |                                                                    |

|    |                                                                                     |                                                                                                                                         |                                                                                                                                                                                                                                                                                                                                                                                                                                                                                                                                                                                                                                                                                                                                                                                                                                                                                                                                                                                                                                                                                                                                                                                                                                                                                                                                                                                                                                                                                                                                                                                                                                                                                                                                                                                          |   |                      |                    |   |                      |             |   |                      |                             |   |                      |        |   |                      |                                                               |   |                      |                                  |   |                      |                           |   |                      |                                                          |   |                      |                                             |    |                       |                                                       |    |                       |                                                       |    |                       |                                                     |    |                       |                                           |    |                       |                                                 |    |                       |                                             |    |                       |                                    |   |                      |       |
|----|-------------------------------------------------------------------------------------|-----------------------------------------------------------------------------------------------------------------------------------------|------------------------------------------------------------------------------------------------------------------------------------------------------------------------------------------------------------------------------------------------------------------------------------------------------------------------------------------------------------------------------------------------------------------------------------------------------------------------------------------------------------------------------------------------------------------------------------------------------------------------------------------------------------------------------------------------------------------------------------------------------------------------------------------------------------------------------------------------------------------------------------------------------------------------------------------------------------------------------------------------------------------------------------------------------------------------------------------------------------------------------------------------------------------------------------------------------------------------------------------------------------------------------------------------------------------------------------------------------------------------------------------------------------------------------------------------------------------------------------------------------------------------------------------------------------------------------------------------------------------------------------------------------------------------------------------------------------------------------------------------------------------------------------------|---|----------------------|--------------------|---|----------------------|-------------|---|----------------------|-----------------------------|---|----------------------|--------|---|----------------------|---------------------------------------------------------------|---|----------------------|----------------------------------|---|----------------------|---------------------------|---|----------------------|----------------------------------------------------------|---|----------------------|---------------------------------------------|----|-----------------------|-------------------------------------------------------|----|-----------------------|-------------------------------------------------------|----|-----------------------|-----------------------------------------------------|----|-----------------------|-------------------------------------------|----|-----------------------|-------------------------------------------------|----|-----------------------|---------------------------------------------|----|-----------------------|------------------------------------|---|----------------------|-------|
| 80 | tools_adaptivebeh<br>Show the field ONLY if:<br>[domains(13)] = '1'                 | Adaptive Behaviour, Social Skills or Social Communication<br><br>Please select all that apply                                           | checkbox, Required <table border="1"> <tr> <td>1</td> <td>tools_adaptivebeh__1</td> <td>Clinical Judgement</td> </tr> <tr> <td>2</td> <td>tools_adaptivebeh__2</td> <td>Observation</td> </tr> <tr> <td>3</td> <td>tools_adaptivebeh__3</td> <td>Previous non-FASD diagnoses</td> </tr> <tr> <td>4</td> <td>tools_adaptivebeh__4</td> <td>Bayley</td> </tr> <tr> <td>5</td> <td>tools_adaptivebeh__5</td> <td>Brief Infant-Toddler Social and Emotional Assessment (BITSEA)</td> </tr> <tr> <td>6</td> <td>tools_adaptivebeh__6</td> <td>Child Behaviour Checklist (CBCL)</td> </tr> <tr> <td>7</td> <td>tools_adaptivebeh__7</td> <td>Teacher Report Form (TRF)</td> </tr> <tr> <td>8</td> <td>tools_adaptivebeh__8</td> <td>Behaviour Rating Inventory of Executive Function (BRIEF)</td> </tr> <tr> <td>9</td> <td>tools_adaptivebeh__9</td> <td>Adaptive Behaviour Assessment System (ABAS)</td> </tr> <tr> <td>10</td> <td>tools_adaptivebeh__10</td> <td>Social Language Development Test, Elementary (SLDT-E)</td> </tr> <tr> <td>11</td> <td>tools_adaptivebeh__11</td> <td>Social Language Development Test, Adolescent (SLDT-A)</td> </tr> <tr> <td>12</td> <td>tools_adaptivebeh__12</td> <td>Clinical Evaluation of Language Fundamentals (CELF)</td> </tr> <tr> <td>13</td> <td>tools_adaptivebeh__13</td> <td>Vineland Adaptive Behaviour Scales (VABS)</td> </tr> <tr> <td>14</td> <td>tools_adaptivebeh__14</td> <td>Behaviour Assessment System for Children (BASC)</td> </tr> <tr> <td>15</td> <td>tools_adaptivebeh__15</td> <td>Pragmatic Language Observation Scale (PLOS)</td> </tr> <tr> <td>16</td> <td>tools_adaptivebeh__16</td> <td>Children's Communication Checklist</td> </tr> <tr> <td>0</td> <td>tools_adaptivebeh__0</td> <td>Other</td> </tr> </table> | 1 | tools_adaptivebeh__1 | Clinical Judgement | 2 | tools_adaptivebeh__2 | Observation | 3 | tools_adaptivebeh__3 | Previous non-FASD diagnoses | 4 | tools_adaptivebeh__4 | Bayley | 5 | tools_adaptivebeh__5 | Brief Infant-Toddler Social and Emotional Assessment (BITSEA) | 6 | tools_adaptivebeh__6 | Child Behaviour Checklist (CBCL) | 7 | tools_adaptivebeh__7 | Teacher Report Form (TRF) | 8 | tools_adaptivebeh__8 | Behaviour Rating Inventory of Executive Function (BRIEF) | 9 | tools_adaptivebeh__9 | Adaptive Behaviour Assessment System (ABAS) | 10 | tools_adaptivebeh__10 | Social Language Development Test, Elementary (SLDT-E) | 11 | tools_adaptivebeh__11 | Social Language Development Test, Adolescent (SLDT-A) | 12 | tools_adaptivebeh__12 | Clinical Evaluation of Language Fundamentals (CELF) | 13 | tools_adaptivebeh__13 | Vineland Adaptive Behaviour Scales (VABS) | 14 | tools_adaptivebeh__14 | Behaviour Assessment System for Children (BASC) | 15 | tools_adaptivebeh__15 | Pragmatic Language Observation Scale (PLOS) | 16 | tools_adaptivebeh__16 | Children's Communication Checklist | 0 | tools_adaptivebeh__0 | Other |
| 1  | tools_adaptivebeh__1                                                                | Clinical Judgement                                                                                                                      |                                                                                                                                                                                                                                                                                                                                                                                                                                                                                                                                                                                                                                                                                                                                                                                                                                                                                                                                                                                                                                                                                                                                                                                                                                                                                                                                                                                                                                                                                                                                                                                                                                                                                                                                                                                          |   |                      |                    |   |                      |             |   |                      |                             |   |                      |        |   |                      |                                                               |   |                      |                                  |   |                      |                           |   |                      |                                                          |   |                      |                                             |    |                       |                                                       |    |                       |                                                       |    |                       |                                                     |    |                       |                                           |    |                       |                                                 |    |                       |                                             |    |                       |                                    |   |                      |       |
| 2  | tools_adaptivebeh__2                                                                | Observation                                                                                                                             |                                                                                                                                                                                                                                                                                                                                                                                                                                                                                                                                                                                                                                                                                                                                                                                                                                                                                                                                                                                                                                                                                                                                                                                                                                                                                                                                                                                                                                                                                                                                                                                                                                                                                                                                                                                          |   |                      |                    |   |                      |             |   |                      |                             |   |                      |        |   |                      |                                                               |   |                      |                                  |   |                      |                           |   |                      |                                                          |   |                      |                                             |    |                       |                                                       |    |                       |                                                       |    |                       |                                                     |    |                       |                                           |    |                       |                                                 |    |                       |                                             |    |                       |                                    |   |                      |       |
| 3  | tools_adaptivebeh__3                                                                | Previous non-FASD diagnoses                                                                                                             |                                                                                                                                                                                                                                                                                                                                                                                                                                                                                                                                                                                                                                                                                                                                                                                                                                                                                                                                                                                                                                                                                                                                                                                                                                                                                                                                                                                                                                                                                                                                                                                                                                                                                                                                                                                          |   |                      |                    |   |                      |             |   |                      |                             |   |                      |        |   |                      |                                                               |   |                      |                                  |   |                      |                           |   |                      |                                                          |   |                      |                                             |    |                       |                                                       |    |                       |                                                       |    |                       |                                                     |    |                       |                                           |    |                       |                                                 |    |                       |                                             |    |                       |                                    |   |                      |       |
| 4  | tools_adaptivebeh__4                                                                | Bayley                                                                                                                                  |                                                                                                                                                                                                                                                                                                                                                                                                                                                                                                                                                                                                                                                                                                                                                                                                                                                                                                                                                                                                                                                                                                                                                                                                                                                                                                                                                                                                                                                                                                                                                                                                                                                                                                                                                                                          |   |                      |                    |   |                      |             |   |                      |                             |   |                      |        |   |                      |                                                               |   |                      |                                  |   |                      |                           |   |                      |                                                          |   |                      |                                             |    |                       |                                                       |    |                       |                                                       |    |                       |                                                     |    |                       |                                           |    |                       |                                                 |    |                       |                                             |    |                       |                                    |   |                      |       |
| 5  | tools_adaptivebeh__5                                                                | Brief Infant-Toddler Social and Emotional Assessment (BITSEA)                                                                           |                                                                                                                                                                                                                                                                                                                                                                                                                                                                                                                                                                                                                                                                                                                                                                                                                                                                                                                                                                                                                                                                                                                                                                                                                                                                                                                                                                                                                                                                                                                                                                                                                                                                                                                                                                                          |   |                      |                    |   |                      |             |   |                      |                             |   |                      |        |   |                      |                                                               |   |                      |                                  |   |                      |                           |   |                      |                                                          |   |                      |                                             |    |                       |                                                       |    |                       |                                                       |    |                       |                                                     |    |                       |                                           |    |                       |                                                 |    |                       |                                             |    |                       |                                    |   |                      |       |
| 6  | tools_adaptivebeh__6                                                                | Child Behaviour Checklist (CBCL)                                                                                                        |                                                                                                                                                                                                                                                                                                                                                                                                                                                                                                                                                                                                                                                                                                                                                                                                                                                                                                                                                                                                                                                                                                                                                                                                                                                                                                                                                                                                                                                                                                                                                                                                                                                                                                                                                                                          |   |                      |                    |   |                      |             |   |                      |                             |   |                      |        |   |                      |                                                               |   |                      |                                  |   |                      |                           |   |                      |                                                          |   |                      |                                             |    |                       |                                                       |    |                       |                                                       |    |                       |                                                     |    |                       |                                           |    |                       |                                                 |    |                       |                                             |    |                       |                                    |   |                      |       |
| 7  | tools_adaptivebeh__7                                                                | Teacher Report Form (TRF)                                                                                                               |                                                                                                                                                                                                                                                                                                                                                                                                                                                                                                                                                                                                                                                                                                                                                                                                                                                                                                                                                                                                                                                                                                                                                                                                                                                                                                                                                                                                                                                                                                                                                                                                                                                                                                                                                                                          |   |                      |                    |   |                      |             |   |                      |                             |   |                      |        |   |                      |                                                               |   |                      |                                  |   |                      |                           |   |                      |                                                          |   |                      |                                             |    |                       |                                                       |    |                       |                                                       |    |                       |                                                     |    |                       |                                           |    |                       |                                                 |    |                       |                                             |    |                       |                                    |   |                      |       |
| 8  | tools_adaptivebeh__8                                                                | Behaviour Rating Inventory of Executive Function (BRIEF)                                                                                |                                                                                                                                                                                                                                                                                                                                                                                                                                                                                                                                                                                                                                                                                                                                                                                                                                                                                                                                                                                                                                                                                                                                                                                                                                                                                                                                                                                                                                                                                                                                                                                                                                                                                                                                                                                          |   |                      |                    |   |                      |             |   |                      |                             |   |                      |        |   |                      |                                                               |   |                      |                                  |   |                      |                           |   |                      |                                                          |   |                      |                                             |    |                       |                                                       |    |                       |                                                       |    |                       |                                                     |    |                       |                                           |    |                       |                                                 |    |                       |                                             |    |                       |                                    |   |                      |       |
| 9  | tools_adaptivebeh__9                                                                | Adaptive Behaviour Assessment System (ABAS)                                                                                             |                                                                                                                                                                                                                                                                                                                                                                                                                                                                                                                                                                                                                                                                                                                                                                                                                                                                                                                                                                                                                                                                                                                                                                                                                                                                                                                                                                                                                                                                                                                                                                                                                                                                                                                                                                                          |   |                      |                    |   |                      |             |   |                      |                             |   |                      |        |   |                      |                                                               |   |                      |                                  |   |                      |                           |   |                      |                                                          |   |                      |                                             |    |                       |                                                       |    |                       |                                                       |    |                       |                                                     |    |                       |                                           |    |                       |                                                 |    |                       |                                             |    |                       |                                    |   |                      |       |
| 10 | tools_adaptivebeh__10                                                               | Social Language Development Test, Elementary (SLDT-E)                                                                                   |                                                                                                                                                                                                                                                                                                                                                                                                                                                                                                                                                                                                                                                                                                                                                                                                                                                                                                                                                                                                                                                                                                                                                                                                                                                                                                                                                                                                                                                                                                                                                                                                                                                                                                                                                                                          |   |                      |                    |   |                      |             |   |                      |                             |   |                      |        |   |                      |                                                               |   |                      |                                  |   |                      |                           |   |                      |                                                          |   |                      |                                             |    |                       |                                                       |    |                       |                                                       |    |                       |                                                     |    |                       |                                           |    |                       |                                                 |    |                       |                                             |    |                       |                                    |   |                      |       |
| 11 | tools_adaptivebeh__11                                                               | Social Language Development Test, Adolescent (SLDT-A)                                                                                   |                                                                                                                                                                                                                                                                                                                                                                                                                                                                                                                                                                                                                                                                                                                                                                                                                                                                                                                                                                                                                                                                                                                                                                                                                                                                                                                                                                                                                                                                                                                                                                                                                                                                                                                                                                                          |   |                      |                    |   |                      |             |   |                      |                             |   |                      |        |   |                      |                                                               |   |                      |                                  |   |                      |                           |   |                      |                                                          |   |                      |                                             |    |                       |                                                       |    |                       |                                                       |    |                       |                                                     |    |                       |                                           |    |                       |                                                 |    |                       |                                             |    |                       |                                    |   |                      |       |
| 12 | tools_adaptivebeh__12                                                               | Clinical Evaluation of Language Fundamentals (CELF)                                                                                     |                                                                                                                                                                                                                                                                                                                                                                                                                                                                                                                                                                                                                                                                                                                                                                                                                                                                                                                                                                                                                                                                                                                                                                                                                                                                                                                                                                                                                                                                                                                                                                                                                                                                                                                                                                                          |   |                      |                    |   |                      |             |   |                      |                             |   |                      |        |   |                      |                                                               |   |                      |                                  |   |                      |                           |   |                      |                                                          |   |                      |                                             |    |                       |                                                       |    |                       |                                                       |    |                       |                                                     |    |                       |                                           |    |                       |                                                 |    |                       |                                             |    |                       |                                    |   |                      |       |
| 13 | tools_adaptivebeh__13                                                               | Vineland Adaptive Behaviour Scales (VABS)                                                                                               |                                                                                                                                                                                                                                                                                                                                                                                                                                                                                                                                                                                                                                                                                                                                                                                                                                                                                                                                                                                                                                                                                                                                                                                                                                                                                                                                                                                                                                                                                                                                                                                                                                                                                                                                                                                          |   |                      |                    |   |                      |             |   |                      |                             |   |                      |        |   |                      |                                                               |   |                      |                                  |   |                      |                           |   |                      |                                                          |   |                      |                                             |    |                       |                                                       |    |                       |                                                       |    |                       |                                                     |    |                       |                                           |    |                       |                                                 |    |                       |                                             |    |                       |                                    |   |                      |       |
| 14 | tools_adaptivebeh__14                                                               | Behaviour Assessment System for Children (BASC)                                                                                         |                                                                                                                                                                                                                                                                                                                                                                                                                                                                                                                                                                                                                                                                                                                                                                                                                                                                                                                                                                                                                                                                                                                                                                                                                                                                                                                                                                                                                                                                                                                                                                                                                                                                                                                                                                                          |   |                      |                    |   |                      |             |   |                      |                             |   |                      |        |   |                      |                                                               |   |                      |                                  |   |                      |                           |   |                      |                                                          |   |                      |                                             |    |                       |                                                       |    |                       |                                                       |    |                       |                                                     |    |                       |                                           |    |                       |                                                 |    |                       |                                             |    |                       |                                    |   |                      |       |
| 15 | tools_adaptivebeh__15                                                               | Pragmatic Language Observation Scale (PLOS)                                                                                             |                                                                                                                                                                                                                                                                                                                                                                                                                                                                                                                                                                                                                                                                                                                                                                                                                                                                                                                                                                                                                                                                                                                                                                                                                                                                                                                                                                                                                                                                                                                                                                                                                                                                                                                                                                                          |   |                      |                    |   |                      |             |   |                      |                             |   |                      |        |   |                      |                                                               |   |                      |                                  |   |                      |                           |   |                      |                                                          |   |                      |                                             |    |                       |                                                       |    |                       |                                                       |    |                       |                                                     |    |                       |                                           |    |                       |                                                 |    |                       |                                             |    |                       |                                    |   |                      |       |
| 16 | tools_adaptivebeh__16                                                               | Children's Communication Checklist                                                                                                      |                                                                                                                                                                                                                                                                                                                                                                                                                                                                                                                                                                                                                                                                                                                                                                                                                                                                                                                                                                                                                                                                                                                                                                                                                                                                                                                                                                                                                                                                                                                                                                                                                                                                                                                                                                                          |   |                      |                    |   |                      |             |   |                      |                             |   |                      |        |   |                      |                                                               |   |                      |                                  |   |                      |                           |   |                      |                                                          |   |                      |                                             |    |                       |                                                       |    |                       |                                                       |    |                       |                                                     |    |                       |                                           |    |                       |                                                 |    |                       |                                             |    |                       |                                    |   |                      |       |
| 0  | tools_adaptivebeh__0                                                                | Other                                                                                                                                   |                                                                                                                                                                                                                                                                                                                                                                                                                                                                                                                                                                                                                                                                                                                                                                                                                                                                                                                                                                                                                                                                                                                                                                                                                                                                                                                                                                                                                                                                                                                                                                                                                                                                                                                                                                                          |   |                      |                    |   |                      |             |   |                      |                             |   |                      |        |   |                      |                                                               |   |                      |                                  |   |                      |                           |   |                      |                                                          |   |                      |                                             |    |                       |                                                       |    |                       |                                                       |    |                       |                                                     |    |                       |                                           |    |                       |                                                 |    |                       |                                             |    |                       |                                    |   |                      |       |
| 81 | adaptive_subtests_bayley<br>Show the field ONLY if:<br>[tools_adaptivebeh(4)] = '1' | For the Bayley, please specify the subtests/screener used.                                                                              | notes                                                                                                                                                                                                                                                                                                                                                                                                                                                                                                                                                                                                                                                                                                                                                                                                                                                                                                                                                                                                                                                                                                                                                                                                                                                                                                                                                                                                                                                                                                                                                                                                                                                                                                                                                                                    |   |                      |                    |   |                      |             |   |                      |                             |   |                      |        |   |                      |                                                               |   |                      |                                  |   |                      |                           |   |                      |                                                          |   |                      |                                             |    |                       |                                                       |    |                       |                                                       |    |                       |                                                     |    |                       |                                           |    |                       |                                                 |    |                       |                                             |    |                       |                                    |   |                      |       |
| 82 | ef_subtests_sltd_e<br>Show the field ONLY if:<br>[tools_adaptivebeh(10)] = '1'      | For the SLDT-E, please specify subtests used if not administering the full battery.                                                     | notes                                                                                                                                                                                                                                                                                                                                                                                                                                                                                                                                                                                                                                                                                                                                                                                                                                                                                                                                                                                                                                                                                                                                                                                                                                                                                                                                                                                                                                                                                                                                                                                                                                                                                                                                                                                    |   |                      |                    |   |                      |             |   |                      |                             |   |                      |        |   |                      |                                                               |   |                      |                                  |   |                      |                           |   |                      |                                                          |   |                      |                                             |    |                       |                                                       |    |                       |                                                       |    |                       |                                                     |    |                       |                                           |    |                       |                                                 |    |                       |                                             |    |                       |                                    |   |                      |       |
| 83 | ef_subtests_sltd_a<br>Show the field ONLY if:<br>[tools_adaptivebeh(11)] = '1'      | For the SLDT-A, please specify subtests used if not administering the full battery.                                                     | notes                                                                                                                                                                                                                                                                                                                                                                                                                                                                                                                                                                                                                                                                                                                                                                                                                                                                                                                                                                                                                                                                                                                                                                                                                                                                                                                                                                                                                                                                                                                                                                                                                                                                                                                                                                                    |   |                      |                    |   |                      |             |   |                      |                             |   |                      |        |   |                      |                                                               |   |                      |                                  |   |                      |                           |   |                      |                                                          |   |                      |                                             |    |                       |                                                       |    |                       |                                                       |    |                       |                                                     |    |                       |                                           |    |                       |                                                 |    |                       |                                             |    |                       |                                    |   |                      |       |
| 84 | adaptive_subtest_celf<br>Show the field ONLY if:<br>[tools_adaptivebeh(12)] = '1'   | For the CELF, please specify the subtests/screener used if not administering the core battery.                                          | notes                                                                                                                                                                                                                                                                                                                                                                                                                                                                                                                                                                                                                                                                                                                                                                                                                                                                                                                                                                                                                                                                                                                                                                                                                                                                                                                                                                                                                                                                                                                                                                                                                                                                                                                                                                                    |   |                      |                    |   |                      |             |   |                      |                             |   |                      |        |   |                      |                                                               |   |                      |                                  |   |                      |                           |   |                      |                                                          |   |                      |                                             |    |                       |                                                       |    |                       |                                                       |    |                       |                                                     |    |                       |                                           |    |                       |                                                 |    |                       |                                             |    |                       |                                    |   |                      |       |
| 85 | adaptive_subtest_vbas<br>Show the field ONLY if:<br>[tools_adaptivebeh(13)] = '1'   | For the VBAS, please specify the domains assessed if not using the full measure.                                                        | notes                                                                                                                                                                                                                                                                                                                                                                                                                                                                                                                                                                                                                                                                                                                                                                                                                                                                                                                                                                                                                                                                                                                                                                                                                                                                                                                                                                                                                                                                                                                                                                                                                                                                                                                                                                                    |   |                      |                    |   |                      |             |   |                      |                             |   |                      |        |   |                      |                                                               |   |                      |                                  |   |                      |                           |   |                      |                                                          |   |                      |                                             |    |                       |                                                       |    |                       |                                                       |    |                       |                                                     |    |                       |                                           |    |                       |                                                 |    |                       |                                             |    |                       |                                    |   |                      |       |
| 86 | tools_adapbeh_other<br>Show the field ONLY if:<br>[tools_adaptivebeh(0)] = '1'      | If other, please specify, including subtests where appropriate.                                                                         | notes                                                                                                                                                                                                                                                                                                                                                                                                                                                                                                                                                                                                                                                                                                                                                                                                                                                                                                                                                                                                                                                                                                                                                                                                                                                                                                                                                                                                                                                                                                                                                                                                                                                                                                                                                                                    |   |                      |                    |   |                      |             |   |                      |                             |   |                      |        |   |                      |                                                               |   |                      |                                  |   |                      |                           |   |                      |                                                          |   |                      |                                             |    |                       |                                                       |    |                       |                                                       |    |                       |                                                     |    |                       |                                           |    |                       |                                                 |    |                       |                                             |    |                       |                                    |   |                      |       |
| 87 | tools_other<br>Show the field ONLY if:<br>[domains(14)] = '1'                       | Other Domains (Not Listed Above)<br><br>Please specify domains and all tools used to assess this, including subtests where appropriate. | notes                                                                                                                                                                                                                                                                                                                                                                                                                                                                                                                                                                                                                                                                                                                                                                                                                                                                                                                                                                                                                                                                                                                                                                                                                                                                                                                                                                                                                                                                                                                                                                                                                                                                                                                                                                                    |   |                      |                    |   |                      |             |   |                      |                             |   |                      |        |   |                      |                                                               |   |                      |                                  |   |                      |                           |   |                      |                                                          |   |                      |                                             |    |                       |                                                       |    |                       |                                                       |    |                       |                                                     |    |                       |                                           |    |                       |                                                 |    |                       |                                             |    |                       |                                    |   |                      |       |

|    |                                                                                    |                                                                                                                                                                         |                                                                                                                                             |   |            |   |            |   |          |
|----|------------------------------------------------------------------------------------|-------------------------------------------------------------------------------------------------------------------------------------------------------------------------|---------------------------------------------------------------------------------------------------------------------------------------------|---|------------|---|------------|---|----------|
| 88 | assess_length<br><br>Show the field ONLY if:<br>[consent] = '1'                    | Section Header:<br>How long on average does an FASD assessment take?                                                                                                    | text<br>Custom alignment: RH                                                                                                                |   |            |   |            |   |          |
| 89 | assess_difficulties<br><br>Show the field ONLY if:<br>[consent] = '1'              | Do you encounter any difficulties in your practice with the FASD assessment or diagnostic process?                                                                      | yesno, Required<br><table><tr><td>1</td><td>Yes</td></tr><tr><td>0</td><td>No</td></tr></table><br>Custom alignment: RH                     | 1 | Yes        | 0 | No         |   |          |
| 1  | Yes                                                                                |                                                                                                                                                                         |                                                                                                                                             |   |            |   |            |   |          |
| 0  | No                                                                                 |                                                                                                                                                                         |                                                                                                                                             |   |            |   |            |   |          |
| 90 | assess_diff_describe<br><br>Show the field ONLY if:<br>[assess_difficulties] = '1' | If yes, please describe                                                                                                                                                 | notes<br>Custom alignment: RH                                                                                                               |   |            |   |            |   |          |
| 91 | united_diagnostic<br><br>Show the field ONLY if:<br>[consent] = '1'                | There are multiple diagnostic criteria available around the world.<br>Do you think that it is possible to develop a unified international guideline for FASD diagnosis? | yesno, Required<br><table><tr><td>1</td><td>Yes</td></tr><tr><td>0</td><td>No</td></tr></table><br>Custom alignment: RH                     | 1 | Yes        | 0 | No         |   |          |
| 1  | Yes                                                                                |                                                                                                                                                                         |                                                                                                                                             |   |            |   |            |   |          |
| 0  | No                                                                                 |                                                                                                                                                                         |                                                                                                                                             |   |            |   |            |   |          |
| 92 | united_diagnostic_worth<br><br>Show the field ONLY if:<br>[consent] = '1'          | Do you think there is a need for a unified international guideline for FASD diagnosis?                                                                                  | yesno, Required<br><table><tr><td>1</td><td>Yes</td></tr><tr><td>0</td><td>No</td></tr></table><br>Custom alignment: RH                     | 1 | Yes        | 0 | No         |   |          |
| 1  | Yes                                                                                |                                                                                                                                                                         |                                                                                                                                             |   |            |   |            |   |          |
| 0  | No                                                                                 |                                                                                                                                                                         |                                                                                                                                             |   |            |   |            |   |          |
| 93 | united_diag_barriers<br><br>Show the field ONLY if:<br>[consent] = '1'             | What are the barriers to a unified international guideline for FASD diagnosis?                                                                                          | notes<br>Custom alignment: RH                                                                                                               |   |            |   |            |   |          |
| 94 | united_diag_facilitators<br><br>Show the field ONLY if:<br>[consent] = '1'         | What are the facilitators for a unified international guideline for FASD diagnosis?                                                                                     | notes<br>Custom alignment: RH                                                                                                               |   |            |   |            |   |          |
| 95 | comments_suggestions<br><br>Show the field ONLY if:<br>[consent] = '1'             | Do you have any other suggestions or comments from your experience regarding FASD assessment and diagnosis?                                                             | notes<br>Custom alignment: RH                                                                                                               |   |            |   |            |   |          |
| 96 | diagnostic_clinic_survey_complete                                                  | Section Header: <i>Form Status</i><br>Complete?                                                                                                                         | dropdown<br><table><tr><td>0</td><td>Incomplete</td></tr><tr><td>1</td><td>Unverified</td></tr><tr><td>2</td><td>Complete</td></tr></table> | 0 | Incomplete | 1 | Unverified | 2 | Complete |
| 0  | Incomplete                                                                         |                                                                                                                                                                         |                                                                                                                                             |   |            |   |            |   |          |
| 1  | Unverified                                                                         |                                                                                                                                                                         |                                                                                                                                             |   |            |   |            |   |          |
| 2  | Complete                                                                           |                                                                                                                                                                         |                                                                                                                                             |   |            |   |            |   |          |
